# Supplementary material for: Nano-scale architecture of blood-brain barrier tight-junctions
Source: eLife journal article supplement (doi:10.7554/elife.63253), 2021-12-24
Supplement: supp [file elife-63253-supp-v1.zip]

Archive with 16 entries (16 files):
- elife_poa_e63253_Transparent_Reporting_File.pdf
- elife_poa_e63253_Figure_1_figure_supplement_1.pdf
- elife_poa_e63253_Figure_2_figure_supplement_1.pdf
- elife_poa_e63253_Figure_2_figure_supplement_2.pdf
- elife_poa_e63253_Figure_5_figure_supplement_1.pdf
- elife_poa_e63253_Figure_6_figure_supplement_1.pdf
- elife_poa_e63253_Figure_6_figure_supplement_2.pdf
- elife_poa_e63253_Figure_1_source_data_1.xlsx
- elife_poa_e63253_Figure_1_figure_supplement_1_source_data_1.xlsx
- elife_poa_e63253_Figure_2_source_data_1.xlsx
- elife_poa_e63253_Figure_2_figure_supplement_1_source_data_1.zip
- elife_poa_e63253_Figure_2_figure_supplement_2_source_data_1.xlsx
- elife_poa_e63253_Figure_5_source_data_1.xlsx
- elife_poa_e63253_Figure_6_source_data_1.xlsx
- elife_poa_e63253_Figure_7_source_data_1.xlsx
- elife_poa_e63253_Figure_8_source_data_1.xlsx
