# Supplementary material for: Nano-scale architecture of blood-brain barrier tight-junctions
Source: eLife journal article supplement (doi:10.7554/elife.63253), 2021-12-24

**Figure 2-figure supplement 1**

**Total claudin-5 protein levels in bEND.3 cells are elevated along days in culture**

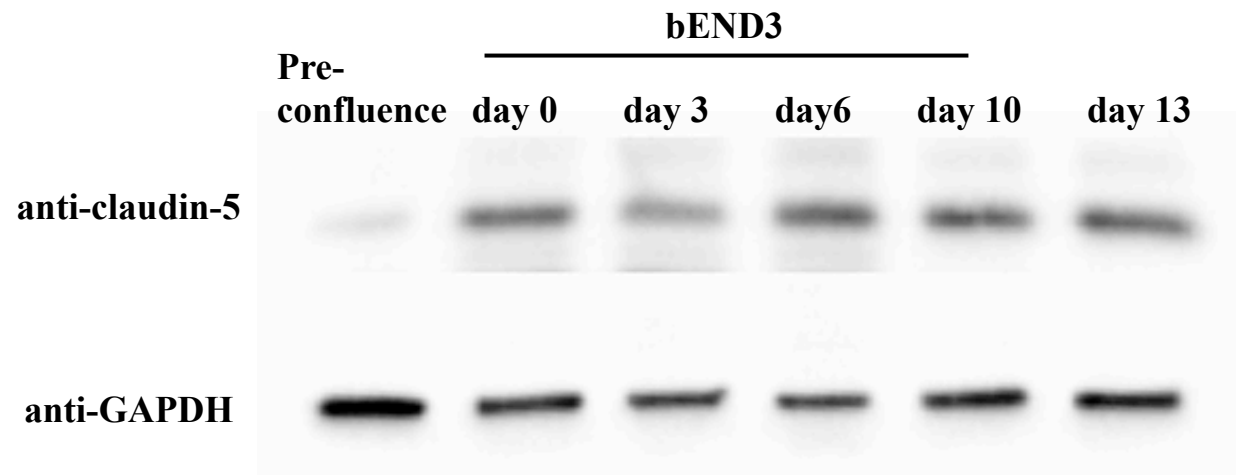

Supplement: supp [file elife-63253-supp-v1.zip]
