# Supplementary material for: Nano-scale architecture of blood-brain barrier tight-junctions
Source: eLife journal article supplement (doi:10.7554/elife.63253), 2021-12-24
Supplement: supp [file elife-63253-supp-v1.zip › elife_poa_e63253_Figure_1_figure_supplement_1_source_data_1.xlsx]

## Sheet: גיליון1
	40nm						50nm						60nm						70nm						80nm						90nm						100nm
	area nm	signal	area micron	densety	capilary number		area nm	signal	area micron	densety	capilary number		area nm	signal	area micron	densety	capilary number		area nm	signal	area micron	densety	capilary number		area nm	signal	area micron	densety	capilary number		area nm	signal	area micron	densety	capilary number		area nm	signal	area micron	densety	capilary number
	7918.5	22	0.0079185	2778.3	1		152080	2030	0.15208	13348.3	1		267612	803	0.267612	3000.62	1		21266.5	16	0.0212665	752.357	1		127108	1984	0.127108	15608.8	1		127108	1984	0.127108	15608.8	1		32546.5	12	0.0325465	368.703	1
	8873	15	0.008873	1690.52	1		267612	803	0.267612	3000.62	1		8873	15	0.008873	1690.52	1		49745	35	0.049745	703.588	1		25534.5	12	0.0255345	469.952	1		25534.5	12	0.0255345	469.952	1		127108	1984	0.127108	15608.8	1
	6493	23	0.006493	3542.28	1		8873	15	0.008873	1690.52	1		10381	13	0.010381	1252.29	1		127108	1984	0.127108	15608.8	1		36496	2000	0.036496	54800.5	1		511880	696	0.51188	1359.7	1		25534.5	12	0.0255345	469.952	1
	36496	2000	0.036496	54800.5	1		36496	2000	0.036496	54800.5	1		25651.5	47	0.0256515	1832.25	1		36496	2000	0.036496	54800.5	1		26313.5	2000	0.0263135	76006.6	1		20545	12	0.020545	584.084	1		511880	696	0.51188	1359.7	1
	26313.5	2000	0.0263135	76006.6	1		26313.5	2000	0.0263135	76006.6	1		36496	2000	0.036496	54800.5	1		26313.5	2000	0.0263135	76006.6	1		6.40906e+06	9694	6.40906	1512.55	1		36496	2000	0.036496	54800.5	1		20545	12	0.020545	584.084	1
	245264	789	0.245263	3216.95	1		1224967	3326	1.22497	2715.18	1		26313.5	2000	0.0263135	76006.6	1		34565.5	34	0.0345655	983.64	1		441095	3337	0.441095	7565.26	1		26313.5	2000	0.0263135	76006.6	1		201818	1986	0.201819	9840.53	1
	165282	1982	0.165282	11991.6	1		256868	630	0.256868	2452.62	1		2.19544e+06	6086	2.19544	2772.12	1		441095	3336	0.441095	7563	1		487976	695	0.487976	1424.25	1		68083.5	63	0.0680835	925.334	1		36496	2000	0.036496	54800.5	1
	162823	594	0.162823	3648.13	1		877432	3811	0.877432	4343.35	1		406310	3331	0.406309	8198.18	1		233797	2042	0.233797	8734.07	1		61614	62	0.061614	1006.26	1		254614	2045	0.254615	8031.75	1		26313.5	2000	0.0263135	76006.6	1
	1.01187e+06	3227	1.01187	3189.15	1		9310	13	0.00931	1396.35	1		1.56565e+06	3385	1.56565	2162.04	1		2.05164e+06	5519	2.05164	2690.05	1		51662	25	0.051662	483.915	1		6525059	9708	6.52506	1487.8	1		54494	58	0.054494	1064.34	1
	825478	3783	0.825479	4582.8	1		1.12607e+06	4435	1.12607	3938.46	1		907478	3816	0.907478	4205.06	1		1538083	4632	1.53808	3011.54	1		1566003	4643	1.566	2964.87	1		189326	1985	0.189326	10484.6	1		93649.5	33	0.0936495	352.378	1
	1054830	4393	1.05483	4164.65	1		358643	1750	0.358643	4879.5	1		337856	650	0.337856	1923.9	1		1615586	3409	1.61559	2110.07	1		175550	1984	0.17555	11301.6	1		1566887	4644	1.56689	2963.84	1		468770	3342	0.46877	7129.3	1
	372648	3320	0.372648	8909.21	1		34979	30	0.034979	857.657	1		16733.5	15	0.0167335	896.405	1		378983	658	0.378983	1736.23	1		254614	2045	0.254615	8031.75	1		93649.5	33	0.0936495	352.378	1		1605873	4645	1.60587	2892.51	1
	140444	2025	0.140443	14418.6	1		171020	1983	0.17102	11595.1	1		120564	1982	0.120564	16439.5	1		14640.5	10	0.0146405	683.037	1		139278	2014	0.139278	14460.3	2		468770	3342	0.46877	7129.3	1		6.61589e+06	9566	6.61589	1445.91	1
	17792	22	0.017792	1236.51	1		6491	11	0.006491	1694.65	1		31531.5	22	0.0315315	697.715	1		44656	24	0.044656	537.442	1		33038.5	2009	0.0330385	60807.8	2		139278	2014	0.139278	14460.3	2		290614	2047	0.290614	7043.72	1
	219972	1005	0.219972	4568.75	1		6134	13	0.006134	2119.33	1		233797	2042	0.233797	8734.07	1		175550	1984	0.17555	11301.6	1		175542	1984	0.175541	11302.2	2		181349	1986	0.181349	10951.3	2		181349	1986	0.181349	10951.3	2
	118603	1981	0.118603	16702.8	1		379870	3327	0.37987	8758.26	1		175550	1984	0.17555	11301.6	1		101521	3468	0.101521	34160.4	2		215142	224	0.215142	1041.17	2		33038.5	2009	0.0330385	60807.8	2		33038.5	2009	0.0330385	60807.8	2
	54063.5	1982	0.0540635	36660.6	2		25651.5	47	0.0256515	1832.25	1		101521	3468	0.101521	34160.4	2		10730.5	67	0.0107305	6243.88	2		6191	22	0.006191	3553.55	2		240264	225	0.240264	936.468	2		240264	225	0.240264	936.468	2
	357033	3007	0.357033	8422.19	2		120564	1982	0.120564	16439.5	1		10730.5	67	0.0107305	6243.88	2		60245.5	1848	0.0602455	30674.5	2		4943	10	0.004943	2023.06	2		1380184	5376	1.38018	3895.13	2		2148462	7390	2.14846	3439.67	2
	13894	210	0.013894	15114.4	2		16275.5	212	0.0162755	13025.7	2		60245.5	1848	0.0602455	30674.5	2		143558	1976	0.143559	13764.4	2		1380184	5374	1.38018	3893.68	2		89185	2001	0.089185	22436.5	2		89185	2001	0.089185	22436.5	2
	101521	3468	0.101521	34160.4	2		101521	3468	0.101521	34160.4	2		143558	1976	0.143559	13764.4	2		33038.5	2009	0.0330385	60807.8	2		89185	2001	0.089185	22436.5	2		9620	11	0.00962	1143.45	2		9620	11	0.00962	1143.45	2
	10730.5	67	0.0107305	6243.88	2		10730.5	67	0.0107305	6243.88	2		33038.5	2009	0.0330385	60807.8	2		1278867	5306	1.27887	4148.99	2		121302	3472	0.121302	28622.9	2		121302	3472	0.121302	28622.9	2		121302	3472	0.121302	28622.9	2
	60245.5	1848	0.0602455	30674.5	2		60245.5	1848	0.0602455	30674.5	2		157032	212	0.157032	1350.04	2		16585.5	157	0.0165855	9466.1	2		231730	3765	0.23173	16247.4	3		1076302	6100	1.0763	5667.55	3		231730	3765	0.23173	16247.4	3
	5097	16	0.005097	3139.1	2		33038.5	2009	0.0330385	60807.8	2		77112	1999	0.077112	25923.3	2		79450	2000	0.07945	25173.1	2		908558	2935	0.908558	3230.4	3		231730	3765	0.23173	16247.4	3		3738209	9037	3.73821	2417.47	3
	32139.5	2008	0.0321395	62477.6	2		1023694	5068	1.02369	4950.7	2		1.21041e+06	5293	1.21041	4372.91	2		210144	223	0.210144	1061.18	2		876096	6089	0.876096	6950.15	3		2606364	9483	2.60636	3638.4	3		205718	1892	0.205718	9197.03	3
	279688	2042	0.279687	7301.01	2		134047	200	0.134047	1492.01	2		16585.5	157	0.0165855	9466.1	2		4943	10	0.004943	2023.06	2		581848	4034	0.581847	6933.09	3		938329	2936	0.938329	3128.97	3		625448	4035	0.625448	6451.38	3
	125928	1970	0.125928	15643.9	2		139519	1975	0.139519	14155.8	2		4943	10	0.004943	2023.06	2		118966	2029	0.118966	17055.4	3		2606364	9483	2.60636	3638.4	3		184734	1891	0.184734	10236.3	3		2.68376e+06	9484	2.68376	3533.85	3
	125686	197	0.125686	1567.4	2		77112	1999	0.077112	25923.3	2		663714	2883	0.663714	4343.74	3		10754.5	10	0.0107545	929.843	3		184734	1891	0.184734	10236.3	3		625448	4035	0.625448	6451.38	3		37850.5	2000	0.0378505	52839.5	4
	16585.5	157	0.0165855	9466.1	2		16585.5	157	0.0165855	9466.1	2		118966	2029	0.118966	17055.4	3		89070.5	2068	0.0890705	23217.6	3		11845.5	331	0.0118455	27943.1	4		13863	15	0.013863	1082.02	4		916620	5700	0.91662	6218.5	4
	4251.5	12	0.0042515	2822.53	3		4943	10	0.004943	2023.06	2		89070.5	2068	0.0890705	23217.6	3		577426	4058	0.577426	7027.74	3		245217	3079	0.245217	12556.2	4		37850.5	2000	0.0378505	52839.5	4		5537.5	10	0.0055375	1805.87	4
	51177	2016	0.051177	39392.7	3		51177	2016	0.051177	39392.7	3		66082	36	0.066082	544.778	3		238031	1930	0.238031	8108.19	3		13863	15	0.013863	1082.02	4		916620	5700	0.91662	6218.5	4		9945.5	20	0.0099455	2010.96	4
	196662	3757	0.196662	19103.8	3		196662	3757	0.196662	19103.8	3		10361.5	15	0.0103615	1447.67	3		42147	24	0.042147	569.436	3		37850.5	2000	0.0378505	52839.5	4		5537.5	10	0.0055375	1805.87	4		162069	3732	0.162069	23027.2	4
	555911	2836	0.555911	5101.54	3		89070.5	2068	0.0890705	23217.6	3		575938	4055	0.575938	7040.69	3		842566	2931	0.842566	3478.66	3		916620	5700	0.91662	6218.5	4		9945.5	20	0.0099455	2010.96	4		482472	3442	0.482473	7134.09	4
	547184	4023	0.547184	7352.19	3		215627	1923	0.215627	8918.18	3		184734	1890	0.184734	10230.9	3		215116	3764	0.215115	17497.6	3		5537.5	10	0.0055375	1805.87	4		162069	3732	0.162069	23027.2	4		408262	3030	0.408262	7421.7	4
	1596903	7416	1.5969	4643.99	3		21714	19	0.021714	875.012	3		208732	3762	0.208731	18023.2	3		104316	757	0.104317	7256.76	3		162069	3732	0.162069	23027.2	4		249718	2142	0.249718	8577.68	4		35778.5	16	0.0357785	447.196	4
	203760	1918	0.203761	9413.01	3		7563	12	0.007563	1586.67	3		2.57645e+06	9481	2.57645	3679.87	3		2606364	9483	2.60636	3638.4	3		14521.5	11	0.0145215	757.498	4		26660.5	15	0.0266605	562.63	4		1040993	6426	1.04099	6172.95	4
	14085	16	0.014085	1135.96	3		1.73478e+06	7436	1.73478	4286.43	3		232214	1928	0.232214	8302.67	3		9368.5	409	0.0093685	43656.9	4		300594	3016	0.300594	10033.5	4		482472	3442	0.482473	7134.09	4		286390	2157	0.28639	7531.69	4
	93207	2020	0.093207	21672.2	3		570724	4050	0.570724	7096.24	3		15466	91	0.015466	5883.87	4		8565.5	202	0.0085655	23583	4		6230.5	19	0.0062305	3049.51	4		408262	3030	0.408262	7421.7	4		181086	2264	0.181086	12502.4	5
	70182	748	0.070182	10658	3		96105	2021	0.096105	21029.1	3		160444	1564	0.160444	9747.95	4		7714.5	253	0.0077145	32795.4	4		249718	2142	0.249718	8577.68	4		1040993	6426	1.04099	6172.95	4		86229	2125	0.086229	24643.7	5
	86167	2067	0.086167	23988.3	3		621751	2872	0.621751	4619.21	3		19720.5	148	0.0197205	7504.88	4		86624.5	231	0.0866245	2666.68	4		482472	3442	0.482473	7134.09	4		181086	2264	0.181086	12502.4	5		116944	2518	0.116944	21531.7	5
	15077	45	0.015077	2984.68	4		147980	1881	0.14798	12711.2	3		13944.5	524	0.0139445	37577.5	4		259528	3083	0.259528	11879.3	4		408262	3030	0.408262	7421.7	4		86229	2125	0.086229	24643.7	5		1.17207e+06	4238	1.17207	3615.84	5
	10895.5	1751	0.0108955	160709	4		9220	14	0.00922	1518.44	3		3225	10	0.003225	3100.78	4		11845.5	331	0.0118455	27943.1	4		132712	2335	0.132712	17594.6	5		116944	2518	0.116944	21531.7	5		1847065	8119	1.84706	4395.62	5
	6242.5	97	0.0062425	15538.6	4		47210.5	1046	0.0472105	22156.1	4		9368.5	409	0.0093685	43656.9	4		245217	3079	0.245217	12556.2	4		181086	2264	0.181086	12502.4	5		1.09892e+06	4235	1.09892	3853.77	5		162550	2337	0.16255	14377.1	5
	5914.5	140	0.0059145	23670.6	4		2878	12	0.002878	4169.56	4		8565.5	202	0.0085655	23583	4		13863	15	0.013863	1082.02	4		86229	2125	0.086229	24643.7	5		1847065	8119	1.84706	4395.62	5		1253298	3200	1.2533	2553.26	6
	3893	11	0.003893	2825.58	4		13881.5	72	0.0138815	5186.76	4		7714.5	253	0.0077145	32795.4	4		37850.5	2000	0.0378505	52839.5	4		116944	2518	0.116944	21531.7	5		162550	2337	0.16255	14377.1	5		4988.5	12	0.0049885	2405.53	6
	7738	25	0.007738	3230.81	4		19287	120	0.019287	6221.81	4		259528	3083	0.259528	11879.3	4		5537.5	10	0.0055375	1805.87	4		1.09892e+06	4232	1.09892	3851.04	5		2249.5	15	0.0022495	6668.15	6		26687.5	21	0.0266875	786.885	6
	47210.5	1046	0.0472105	22156.1	4		5048	29	0.005048	5744.85	4		11845.5	331	0.0118455	27943.1	4		162069	3732	0.162069	23027.2	4		1847065	8119	1.84706	4395.62	5		1253298	3200	1.2533	2553.26	6		6294.5	11	0.0062945	1747.56	6
	2878	12	0.002878	4169.56	4		15466	91	0.015466	5883.87	4		245217	3079	0.245217	12556.2	4		233678	2138	0.233678	9149.36	4		11393	43	0.011393	3774.25	6		4988.5	12	0.0049885	2405.53	6		408591	1189	0.408591	2910	6
	19287	120	0.019287	6221.81	4		19720.5	148	0.0197205	7504.88	4		37850.5	2000	0.0378505	52839.5	4		137708	1897	0.137708	13775.6	4		924612	994	0.924612	1075.05	6		6294.5	11	0.0062945	1747.56	6		988656	997	0.988656	1008.44	6
	5048	29	0.005048	5744.85	4		13944.5	524	0.0139445	37577.5	4		5537.5	10	0.0055375	1805.87	4		12241.5	254	0.0122415	20749.1	4		183464	672	0.183464	3662.84	6		98770.5	46	0.0987705	465.726	6		964064	841	0.964063	872.349	6
	19720.5	148	0.0197205	7504.88	4		9368.5	409	0.0093685	43656.9	4		162069	3732	0.162069	23027.2	4		11177.5	10	0.0111775	894.654	4		2249.5	15	0.0022495	6668.15	6		390686	793	0.390686	2029.77	6		110293	51	0.110293	462.405	6
	13944.5	524	0.0139445	37577.5	4		8565.5	202	0.0085655	23583	4		39336.5	134	0.0393365	3406.51	4		912394	5699	0.912394	6246.2	4		4988.5	12	0.0049885	2405.53	6		408591	1189	0.408591	2910	6		54397	65	0.054397	1194.92	6
	9368.5	409	0.0093685	43656.9	4		7714.5	253	0.0077145	32795.4	4		424026	4124	0.424025	9725.83	4		250604	2799	0.250605	11169	4		6294.5	11	0.0062945	1747.56	6		988656	997	0.988656	1008.44	6		62910.5	64	0.0629105	1017.32	6
	8565.5	202	0.0085655	23583	4		11845.5	331	0.0118455	27943.1	4		181160	1990	0.181161	10984.7	4		78418.5	359	0.0784185	4578	4		1151006	3196	1.15101	2776.7	6		110293	51	0.110293	462.405	6		65918	34	0.065918	515.792	7
	7714.5	253	0.0077145	32795.4	4		245217	3079	0.245217	12556.2	4		9332	14	0.009332	1500.21	4		6230.5	19	0.0062305	3049.51	4		86032	49	0.086032	569.556	6		54397	65	0.054397	1194.92	6		375228	215	0.375229	572.984	7
	11845.5	331	0.0118455	27943.1	4		37850.5	2000	0.0378505	52839.5	4		97028.5	1370	0.0970285	14119.6	4		132712	2335	0.132712	17594.6	5		89645.5	45	0.0896455	501.977	6		72019.5	37	0.0720195	513.75	7		304758	149	0.304758	488.913	7
	245217	3079	0.245217	12556.2	4		5537.5	10	0.0055375	1805.87	4		244544	2798	0.244544	11441.7	4		181086	2264	0.181086	12502.4	5		52591	78	0.052591	1483.14	6		178654	125	0.178654	699.676	7		178654	125	0.178654	699.676	7
	10682.5	253	0.0106825	23683.6	4		33369.5	324	0.0333695	9709.47	4		75678.5	358	0.0756785	4730.54	4		86229	2125	0.086229	24643.7	5		41825	63	0.041825	1506.28	6		915928	3903	0.915928	4261.25	7		915928	3903	0.915928	4261.25	7
	14012	90	0.014012	6423.07	4		412572	4118	0.412572	9981.29	4		12241.5	254	0.0122415	20749.1	4		116944	2518	0.116944	21531.7	5		408591	1189	0.408591	2910	6		318320	207	0.318319	650.29	7		622252	1587	0.622252	2550.41	7
	118712	2057	0.118712	17327.7	4		205186	3042	0.205186	14825.6	4		6230.5	19	0.0062305	3049.51	4		1.09892e+06	4232	1.09892	3851.04	5		4256	10	0.004256	2349.62	7		598602	1586	0.598603	2649.5	7		8266.5	13	0.0082665	1572.61	7
	4307.5	152	0.0043075	35287.3	4		4322.5	18	0.0043225	4164.26	4		132712	2335	0.132712	17594.6	5		1847065	8119	1.84706	4395.62	5		178654	125	0.178654	699.676	7		157416	138	0.157416	876.655	7		1126934	848	1.12693	752.484	8
	4782	11	0.004782	2300.29	4		7150	13	0.00715	1818.18	4		86229	2125	0.086229	24643.7	5		140786	661	0.140786	4695.07	6		915928	3903	0.915928	4261.25	7		8266.5	13	0.0082665	1572.61	7		184138	404	0.184139	2194	8
	240122	2796	0.240122	11644.1	4		162069	3731	0.162069	23021.1	4		116944	2518	0.116944	21531.7	5		36115.5	37	0.0361155	1024.49	6		245131	197	0.245131	803.652	7		1.11915e+06	720	1.11915	643.348	8		99447.5	54	0.0994475	543	8
	197796	2902	0.197796	14671.6	4		123741	1491	0.123741	12049.4	4		355862	2178	0.355862	6120.35	5		72205.5	47	0.0722055	650.92	6		127019	127	0.127019	999.85	7		184138	404	0.184139	2194	8		1359352	736	1.35935	541.434	8
	12010	71	0.01201	5911.74	4		7121.5	14	0.0071215	1965.88	4		372878	2045	0.372877	5484.37	5		11393	43	0.011393	3774.25	6		58680	35	0.05868	596.455	7		236592	119	0.236592	502.977	8		114727	34	0.114727	296.356	8
	167183	1988	0.167183	11891.2	4		181160	1990	0.181161	10984.7	4		1847065	8117	1.84706	4394.54	5		2249.5	15	0.0022495	6668.15	6		563125	1582	0.563125	2809.32	7		1.10816e+06	845	1.10816	762.528	8		281095	125	0.281095	444.69	8
	118143	1984	0.118143	16793.2	4		244544	2798	0.244544	11441.7	4		151792	2261	0.151791	14895.4	5		4988.5	12	0.0049885	2405.53	6		8266.5	13	0.0082665	1572.61	7		2923879	1569	2.92388	536.616	8		312462	304	0.312462	972.92	8
	71100.5	356	0.0711005	5007	4		75678.5	358	0.0756785	4730.54	4		22084	25	0.022084	1132.04	6		6294.5	11	0.0062945	1747.56	6		450282	370	0.450282	821.708	8		90622.5	52	0.0906225	573.809	8		2978772	1573	2.97877	528.07	8
	119038	1490	0.119038	12517.1	4		12241.5	254	0.0122415	20749.1	4		8052.5	35	0.0080525	4346.48	6		83023	44	0.083023	529.974	6		184138	404	0.184139	2194	8		114727	34	0.114727	296.356	8
	33369.5	324	0.0333695	9709.47	4		68411.5	152	0.0684115	2221.85	5		27010.5	35	0.0270105	1295.79	6		393815	1185	0.393815	3009.03	6		116358	34	0.116359	292.2	8		312462	304	0.312462	972.92	8
	4322.5	18	0.0043225	4164.26	4		49180.5	2038	0.0491805	41439.2	5		19891	11	0.019891	553.014	6		9268.5	11	0.0092685	1186.82	6		1.0709e+06	721	1.0709	673.268	8
	162069	3731	0.162069	23021.1	4		116944	2518	0.116944	21531.7	5		43672	37	0.043672	847.225	6		15530.5	11	0.0155305	708.284	6		1.16783e+06	1197	1.16783	1024.98	8
	5589	145	0.005589	25943.8	5		1843689	8114	1.84369	4400.96	5		11393	43	0.011393	3774.25	6		1.14206e+06	3193	1.14206	2795.82	6		1015191	837	1.01519	824.475	8
	7041	26	0.007041	3692.66	5		372878	2043	0.372877	5479.01	5		2249.5	15	0.0022495	6668.15	6		632067	945	0.632067	1495.09	6		20458.5	12	0.0204585	586.553	8
	49180.5	2038	0.0491805	41439.2	5		224956	2023	0.224956	8992.89	5		4988.5	12	0.0049885	2405.53	6		52591	78	0.052591	1483.14	6		236592	119	0.236592	502.977	8
	171768	2005	0.171768	11672.7	5		108790	2333	0.108789	21445.1	5		6294.5	11	0.0062945	1747.56	6		41825	63	0.041825	1506.28	6		128194	66	0.128194	514.843	8
	372878	2039	0.372877	5468.28	5		18653	87	0.018653	4664.13	5		47303.5	77	0.0473035	1627.79	6		28632	34	0.028632	1187.48	7		312462	304	0.312462	972.92	8
	46718.5	1892	0.0467185	40497.9	5		151792	2261	0.151791	14895.4	5		387235	1181	0.387235	3049.83	6		11704	14	0.011704	1196.17	7
	97061	2514	0.097061	25901.2	5		4435.5	26	0.0044355	5861.8	6		885222	3156	0.885222	3565.21	6		4256	10	0.004256	2349.62	7
	494030	4313	0.49403	8730.24	5		232910	679	0.23291	2915.28	6		111294	655	0.111294	5885.34	6		915928	3903	0.915928	4261.25	7
	61432	149	0.061432	2425.45	5		15357.5	52	0.0153575	3385.97	6		10170	27	0.01017	2654.87	6		104868	91	0.104868	867.762	7
	318289	1732	0.318289	5441.6	5		8052.5	35	0.0080525	4346.48	6		606887	943	0.606887	1553.83	6		90326	112	0.090326	1239.95	7
	103096	2332	0.103096	22619.6	5		11393	43	0.011393	3774.25	6		7125	10	0.007125	1403.51	6		521000	1578	0.521	3028.79	7
	18653	87	0.018653	4664.13	5		2249.5	15	0.0022495	6668.15	6		36017	32	0.036017	888.469	6		203204	192	0.203204	944.866	7
	151792	2261	0.151791	14895.4	5		4988.5	12	0.0049885	2405.53	6		29101.5	24	0.0291015	824.7	7		44018.5	31	0.0440185	704.249	7
	6141.5	16	0.0061415	2605.23	6		523005	930	0.523005	1778.19	6		11704	14	0.011704	1196.17	7		8266.5	13	0.0082665	1572.61	7
	3946.5	16	0.0039465	4054.23	6		319417	2396	0.319417	7501.17	6		4256	10	0.004256	2349.62	7		302328	218	0.302329	721.07	8
	11508	19	0.011508	1651.03	6		375482	1176	0.375482	3131.97	6		4050	11	0.00405	2716.05	7		183948	325	0.183948	1766.8	8
	7551.5	12	0.0075515	1589.09	6		12947.5	20	0.0129475	1544.7	6		62421.5	82	0.0624215	1313.65	7		175990	199	0.17599	1130.75	8
	4435.5	26	0.0044355	5861.8	6		40026	36	0.040026	899.415	6		385156	1567	0.385156	4068.48	7		125846	132	0.125847	1048.9	8
	15357.5	52	0.0153575	3385.97	6		23615.5	25	0.0236155	1058.63	6		16221	31	0.016221	1911.1	7		395664	481	0.395664	1215.68	8
	8052.5	35	0.0080525	4346.48	6		74931	68	0.074931	907.502	6		81151.5	111	0.0811515	1367.81	7		207652	237	0.207651	1141.34	8
	11393	43	0.011393	3774.25	6		4198	10	0.004198	2382.09	6		914058	3899	0.914058	4265.59	7		281181	665	0.281181	2365.02	8
	2249.5	15	0.0022495	6668.15	6		108156	654	0.108157	6046.79	6		184732	189	0.184732	1023.1	7		899694	833	0.899694	925.871	8
	4988.5	12	0.0049885	2405.53	6		17006.5	25	0.0170065	1470.03	6		285211	189	0.285211	662.667	8		167602	402	0.167601	2398.55	8
	105428	653	0.105428	6193.77	6		10170	27	0.01017	2654.87	6		6756.5	10	0.0067565	1480.06	8		223034	117	0.223034	524.583	8
	197515	662	0.197515	3351.64	6		53560.5	94	0.0535605	1755.02	7		8135.5	12	0.0081355	1475.02	8		284717	301	0.284717	1057.19	8
	340713	1161	0.340713	3407.56	6		4256	10	0.004256	2349.62	7		11384.5	12	0.0113845	1054.06	8		24614	18	0.024614	731.291	8
	19350	24	0.01935	1240.31	6		147354	180	0.147354	1221.54	7		12076.5	11	0.0120765	910.86	8		81343.5	51	0.0813435	626.971	8
	10571	16	0.010571	1513.57	6		41504	75	0.041504	1807.05	7		268492	604	0.268493	2249.6	8
	403098	866	0.403099	2148.36	6		872126	3896	0.872126	4467.24	7		10920.5	12	0.0109205	1098.85	8
	10797	19	0.010797	1759.75	6		11353	17	0.011353	1497.4	7		200960	280	0.20096	1393.31	8
	6087	13	0.006087	2135.7	6		11429.5	15	0.0114295	1312.39	7		224698	654	0.224697	2910.58	8
	296814	2388	0.296814	8045.46	6		4225	11	0.004225	2603.55	7		20396	17	0.020396	833.497	8
	6998	25	0.006998	3572.45	6		4050	11	0.00405	2716.05	7		6432	11	0.006432	1710.2	8
	8176.5	17	0.0081765	2079.13	6		385156	1567	0.385156	4068.48	7		153933	399	0.153933	2592.04	8
	4198	10	0.004198	2382.09	6		16221	31	0.016221	1911.1	7		146676	92	0.146676	627.231	8
	3883.5	13	0.0038835	3347.5	7		5776.5	13	0.0057765	2250.5	8		203526	235	0.203525	1154.65	8
	4827.5	13	0.0048275	2692.91	7		13917.5	15	0.0139175	1077.78	8		26741	23	0.026741	860.102	8
	5999	11	0.005999	1833.64	7		148302	187	0.148302	1260.94	8		200300	200	0.2003	998.5	8
	347036	1543	0.347037	4446.22	7		10861	14	0.010861	1289.02	8		174910	323	0.174909	1846.67	8
	3020	10	0.00302	3311.26	7		3573	11	0.003573	3078.65	8		172015	197	0.172015	1145.25	8
	5617	17	0.005617	3026.53	7		8135.5	12	0.0081355	1475.02	8		108769	127	0.108769	1167.61	8
	38587	81	0.038587	2099.15	7		173440	225	0.17344	1297.28	8		318384	468	0.318384	1469.92	8
	39999.5	74	0.0399995	1850.02	7		51541.5	38	0.0515415	737.27	8
	77680	149	0.07768	1918.13	7		84657.5	120	0.0846575	1417.48	8
	6409.5	14	0.0064095	2184.26	7		218587	436	0.218587	1994.63	8
	865457	3890	0.865457	4494.74	7		173562	642	0.173562	3698.97	8
	4050	11	0.00405	2716.05	7		158002	257	0.158002	1626.56	8
	7617	17	0.007617	2231.85	8		32184	33	0.032184	1025.35	8
	8153	13	0.008153	1594.51	8		87933	68	0.087933	773.316	8
	4022.5	13	0.0040225	3231.82	8		124362	393	0.124363	3160.12	8
	13559.5	21	0.0135595	1548.73	8		10753	15	0.010753	1394.96	8
	5776.5	13	0.0057765	2250.5	8		169844	321	0.169844	1889.98	8
	3933	11	0.003933	2796.85	8		174299	143	0.174299	820.429	8
	125262	198	0.125262	1580.68	8		212266	599	0.212266	2821.92	8
	108258	166	0.108258	1533.38	8		155236	182	0.155236	1172.41	8
	8578.5	15	0.0085785	1748.56	8		6172	10	0.006172	1620.22	8
	196724	593	0.196724	3014.37	8		6432	11	0.006432	1710.2	8
	132116	172	0.132116	1301.88	8
	139442	629	0.139441	4510.85	8
	115535	386	0.115535	3340.98	8
	187543	425	0.187543	2266.15	8
	65336	112	0.065336	1714.22	8
	44839.5	43	0.0448395	958.976	8
	70355.5	81	0.0703555	1151.3	8
	158002	255	0.158002	1613.9	8
	159350	320	0.159351	2008.15	8
