# Supplementary material for: Nano-scale architecture of blood-brain barrier tight-junctions
Source: eLife journal article supplement (doi:10.7554/elife.63253), 2021-12-24
Supplement: supp [file elife-63253-supp-v1.zip › elife_poa_e63253_Figure_1_source_data_1.xlsx]

## Sheet: גיליון1
Figure 1d-e
	post confluence (< 7 days)					super confluence (>11 days)
	signals	cluster area in micrometer	densety			signals	cluster area in micrometer	densety
	38	0.063607	597.419			404	0.258351	1563.76
	13	0.021601	601.824			64	0.0911165	702.397
	12	0.0082995	1445.87			44	0.01253	3511.57
	41	0.0746145	549.491			12	0.002502	4796.16
	10	0.0188475	530.574			817	0.237681	3437.37
	10	0.0104965	952.699			809	0.143751	5627.79
	100	0.283106	353.224			72	0.0479115	1502.77
	12	0.0158425	757.456			1154	0.07576	15232.3
	13	0.01332	975.976			219	0.152307	1437.89
	10	0.010072	992.851			21	0.0273225	768.597
	11	0.013918	790.343			1326	0.240571	5511.89
	11	0.017879	615.247			23	0.0095655	2404.47
	10	0.0082495	1212.19			971	0.189144	5133.64
	26	0.0565605	459.685			171	0.158523	1078.71
	15	0.0100915	1486.4			76	0.075159	1011.19
	12	0.020294	591.308			116	0.0932155	1244.43
	10	0.011568	864.454			41	0.0398325	1029.31
	11	0.012625	871.287			2012	0.16356	12301.3
	12	0.0194515	616.919			12	0.0113775	1054.71
	18	0.0085715	2099.98			3803	0.958985	3965.65
	103	0.266846	385.99			239	0.115095	2076.55
	380	1.31519	288.933			22	0.0304675	722.081
	40	0.0888505	450.194			16	0.024882	643.035
	12	0.017001	705.841			154	0.051034	3017.6
	53	0.0148295	3573.96			236	0.259198	910.501
	11	0.0081685	1346.64			196	0.15201	1289.38
	2708	11.4611	236.277			395	0.27886	1416.48
	14	0.0171685	815.447			32	0.050769	630.306
	477	1.21724	391.871			957	0.060363	15854.1
	21	0.02298	913.838			240	0.113596	2112.75
	11	0.0179205	613.822			6575	0.083555	78690.7
	23	0.0489105	470.247			10	0.0083385	1199.26
	30	0.046475	645.508			12	0.012422	966.028
	10	0.0167995	595.256			478	0.0973775	4908.73
	557	1.85714	299.924			362	0.12939	2797.73
	30	0.0573585	523.026			1363	1.04152	1308.66
	39	0.0767405	508.206			363	0.341172	1063.98
	32	0.0424025	754.672			38	0.043755	868.472
	10	0.0134	746.269			10	0.0073835	1354.37
	23	0.041921	548.651			14	0.0290755	481.505
	32	0.047426	674.735			22	0.0374475	587.489
	11	0.0120385	913.735			30	0.0497835	602.609
	13	0.005818	2234.44			14	0.0149615	935.735
	14	0.0304225	460.186			13	0.014932	870.613
	14	0.032707	428.043			453	0.0916115	4944.79
	11	0.015528	708.398			887	1.62355	546.333
	13	0.0161805	803.436			17	0.0332685	510.994
	26	0.0415025	626.468			474	0.309364	1532.18
	18	0.031177	577.349			342	0.387458	882.675
	19	0.029641	641.004			22	0.035504	619.648
	17	0.0331025	513.556			86	0.078867	1090.44
	14	0.0262775	532.775			12	0.024682	486.184
	17	0.026001	653.821			19	0.03069	619.094
	23	0.011599	1982.93			679	0.16106	4215.81
	90	0.195464	460.443			188	0.497645	377.779
	13	0.01933	672.53			297	0.250273	1186.71
	10	0.017529	570.483			47	0.061185	768.162
	20	0.013695	1460.39			59	0.0674065	875.287
	11	0.012097	909.316			755	0.3046	2478.66
	17	0.0157815	1077.21			12	0.015179	790.566
	19	0.027326	695.308			19	0.022972	827.094
	17	0.0349985	485.735			270	0.828827	325.762
	27	0.010125	2666.67			810	0.122829	6594.53
	31	0.018747	1653.6			84	0.0984545	853.186
	1556	1.65462	940.395			26	0.0421725	616.516
	17	0.013688	1241.96			142	0.12349	1149.9
	17	0.012346	1376.96			364	0.254536	1430.06
	282	0.213566	1320.43			122	0.060097	2030.05
	11	0.020374	539.904			13	0.013965	930.899
	16	0.0302415	529.074			17	0.030564	556.21
	116	0.134299	863.744			140	0.0999835	1400.23
	10	0.0086445	1156.8			21	0.0288965	726.732
	185	0.170594	1084.45			21	0.0235475	891.814
	14	0.026699	524.364			14793	0.517056	28610.1
	11	0.004331	2539.83			378	0.44307	853.138
	22	0.026883	818.361			44	0.052228	842.46
	391	0.698367	559.878			174	0.227856	763.64
	209	0.194148	1076.5			220	0.0695965	3161.08
	149	0.13068	1140.19			67	0.095705	700.068
	11	0.0177335	620.295			149	0.171885	866.856
	35	0.0470925	743.218			895	0.245095	3651.64
	307	0.381744	804.205			802	0.609308	1316.25
	10	0.013602	735.186			29	0.0409585	708.034
	54	0.092123	586.173			178	0.0648955	2742.87
	29	0.0655005	442.745			43	0.009106	4722.16
	13	0.021049	617.607			223	0.0304965	7312.31
	16	0.034405	465.049			31	0.017565	1764.87
	3765	3.82714	983.764			72	0.118985	605.116
	159	0.222595	714.303			124	0.241742	512.944
	1502	1.23964	1211.64			540	0.240774	2242.77
	393	0.648795	605.738			59	0.069571	848.055
	43	0.0730295	588.803			1138	0.451483	2520.58
	177	0.170816	1036.21			173	0.12805	1351.04
	353	0.374186	943.38			50	0.05623	889.205
	223	0.163515	1363.79			493	0.780397	631.73
	11	0.0123835	888.279			286	0.106499	2685.46
	2280	2.3512	969.717			53	0.128556	412.27
	78	0.0780855	998.905			93	0.103018	902.755
	193	0.1927	1001.56			12	0.013382	896.727
	27	0.0376045	717.999			47	0.0739885	635.234
	15	0.015139	990.818			28	0.0577715	484.668
	109	0.178515	610.593			83	0.183389	452.59
	79	0.211191	374.07			6695	0.20318	32951.1
	120	0.134697	890.885			76	0.097541	779.16
	28	0.057522	486.77			178	0.190392	934.913
	80	0.0519355	1540.37			32	0.035424	903.342
	17	0.0272235	624.46			199	0.186809	1065.26
	338	0.39232	861.542			33	0.0664095	496.917
	18	0.0326835	550.737			637	0.19027	3347.88
	854	0.684081	1248.39			816	0.12982	6285.63
	511	0.366283	1395.1			97	0.0816275	1188.33
	1206	0.413883	2913.87			40	0.0463285	863.399
	51	0.0930645	548.007			712	0.131781	5402.9
	23	0.039024	589.381			223	0.134093	1663.02
	24	0.0467625	513.232			118	0.187711	628.628
	67	0.123104	544.257			530	0.139074	3810.91
	341	0.21047	1620.19			57	0.070219	811.746
	40	0.066213	604.111			262	0.0870765	3008.85
	14	0.0116965	1196.94			204	0.124199	1642.53
	12	0.014665	818.275			325	0.116645	2786.23
	35	0.0610275	573.512			469	0.217717	2154.18
	921	0.774789	1188.71			16652	0.591005	28175.7
	10	0.0149345	669.591			1894	0.172713	10966.2
	292	0.476123	613.288			1028	0.135545	7584.2
	25	0.0475325	525.956			667	0.112406	5933.87
	6563	6.58767	996.255			23	0.0065735	3498.9
	94	0.190778	492.718			41	0.008193	5004.27
	5414	2.97128	1822.11			16	0.002923	5473.83
	2570	1.61853	1587.86			155	0.0417415	3713.33
	194	0.261817	740.977			23	0.0107035	2148.83
	67	0.106997	626.183			820	0.126723	6470.81
	919	0.443747	2071			4910	0.499115	9837.41
	334	0.403172	828.431			69	0.015076	4576.81
	175	0.23825	734.523			313	0.108669	2880.32
	10099	2.39918	4209.35			2636	0.0746605	35306.5
	1625	1.18395	1372.53			10	0.0007175	13937.3
	380	0.323789	1173.6			699	0.0325235	21492.2
	33	0.0798545	413.252			299	0.048281	6192.91
	679	0.505783	1342.47			553	0.073372	7536.94
	29	0.0664135	436.658			74	0.0727815	1016.74
	93	0.212716	437.204			138	0.039575	3487.05
	260	0.382075	680.495			446	0.072974	6111.77
	1546	0.606835	2547.64			36	0.0201005	1791
	17	0.0184565	921.085			157	0.0537515	2920.85
	67	0.078222	856.537			1675	0.101561	16492.6
	17	0.039255	433.066			23	0.018595	1236.89
	18	0.028516	631.225			31	0.04147	747.528
	10	0.01768	565.611			11	0.0059215	1857.64
	31	0.024883	1245.83			249	0.12139	2051.24
	73	0.050187	1454.56			530	0.096935	5467.58
	15	0.0224625	667.78			13	0.0022125	5875.71
	21	0.048774	430.557			22	0.0241805	909.824
	2282	0.294806	7740.68			352	0.111302	3162.57
	104	0.0732035	1420.7			31	0.049213	629.915
	13	0.010454	1243.54			53	0.0556725	951.996
	51	0.079182	644.086			1466	0.0507795	28869.9
	14	0.0214025	654.129			30	0.017163	1747.95
	2113	1.34048	1576.31			145	0.091865	1578.4
	13	0.016541	785.926			79	0.055552	1422.09
	17	0.0185335	917.258			263	0.0421295	6242.66
	16	0.024381	656.249			93	0.038134	2438.77
	192	0.175503	1094			851	0.068258	12467.4
	10	0.012098	826.583			12	0.016336	734.574
	520	0.482288	1078.19			28	0.0138315	2024.36
	10	0.014611	684.416			19	0.0062775	3026.68
	284	0.405799	699.854			682	0.2623	2600.08
	559	0.277274	2016.05			13	0.00773	1681.76
	3781	1.23597	3059.14			477	0.177747	2683.6
	404	0.296183	1364.02			586	0.0604845	9688.43
	1065	1.41075	754.915			760	0.103263	7359.85
	32	0.024757	1292.56			2127	0.131983	16115.7
	475	0.852403	557.248			18	0.01908	943.396
	407	0.448277	907.921			679	0.0949725	7149.44
	2455	1.57926	1554.52			14	0.006736	2078.38
	4631	3.96495	1167.98			27	0.0127275	2121.39
	25	0.0623955	400.67			22	0.007184	3062.36
	10	0.019894	502.664			439	0.038645	11359.8
	19	0.0285955	664.44			46	0.0431865	1065.15
	127	0.101644	1249.46			352	0.122473	2874.1
	11	0.0132665	829.156			216	0.0255995	8437.66
	26	0.03891	668.209			25	0.0068695	3639.28
	16	0.033483	477.854			1338	0.0970695	13783.9
	793	1.1796	672.263
	72	0.094823	759.309
	191	0.293976	649.714
	28	0.034585	809.6
	1536	1.01237	1517.23
	18	0.018875	953.642
	169	0.219515	769.879
	80	0.147701	541.637
	7687	1.9297	3983.52
	81	0.181985	445.092
	39	0.069031	564.964
	16	0.028264	566.091
	108	0.122986	878.145
	2514	2.21097	1137.06
	65	0.146343	444.16
	561	0.758234	739.878
	28	0.0549515	509.54
	232	0.161118	1439.94
	10	0.016376	610.65
	10	0.022912	436.453
	19	0.0282515	672.531
	13	0.02724	477.239
	211	0.450847	468.008
	11	0.013943	788.926
	158	0.149961	1053.6
	596	0.519989	1146.18
	12	0.016559	724.681
	13	0.028681	453.262
	169	0.169604	996.439
	51	0.103423	493.123
	276	0.192516	1433.65
	11	0.020495	536.716
	25	0.034205	730.887
	222	0.158163	1403.62
	16	0.035003	457.104
	11	0.012015	915.522
	12	0.008657	1386.16
	30	0.0623805	480.92
	455	0.128142	3550.73
	189	0.354538	533.088
	31	0.057964	534.815
	110	0.15136	726.744
	393	0.580614	676.87
	14	0.0137455	1018.52
	57	0.120775	471.95
	14	0.021274	658.08
	1251	0.37032	3378.16
	990	0.260257	3803.94
	1322	0.470832	2807.8
	2533	1.78752	1417.05
	289	0.202874	1424.53
	74	0.104933	705.209
	337	0.542285	621.444
	341	0.409176	833.382
	2213	0.819554	2700.25
	257	0.381576	673.522
	6744	4.25993	1583.12
	102	0.213595	477.539
	209	0.191376	1092.09
	1060	0.832368	1273.48
	133	0.167404	794.488
	134	0.132542	1011
	71	0.10246	692.95
	21	0.036427	576.495
	25	0.020336	1229.35
	16	0.028189	567.597
	16	0.0142195	1125.22
	92	0.09551	963.25
	142	0.136588	1039.63
	13602	5.7667	2358.72
	16	0.010133	1579
	122	0.173549	702.971
	147	0.145207	1012.35
	33	0.0735655	448.58
	185	0.339131	545.513
	11	0.0100315	1096.55
	721	0.668859	1077.96
	12	0.016124	744.232
	1088	0.549424	1980.26
	148	0.295413	500.994
	16	0.039283	407.301
	138	0.174112	792.593
	70	0.090732	771.503
	82	0.104061	787.999
	2241	1.04314	2148.32
	13	0.01533	848.01
	183	0.290261	630.467
	11	0.016216	678.342
	63	0.0642825	980.049
	65	0.0753875	862.212
	400	0.30453	1313.5
	31	0.0422575	733.598
	258	0.524166	492.21
	160	0.154989	1032.33
	13	0.020925	621.266
	12	0.02493	481.348
	144	0.153061	940.798
	27	0.066217	407.75
	1615	0.41938	3850.92
