# Supplementary material for: Nano-scale architecture of blood-brain barrier tight-junctions
Source: eLife journal article supplement (doi:10.7554/elife.63253), 2021-12-24
Supplement: supp [file elife-63253-supp-v1.zip › elife_poa_e63253_Figure_2_figure_supplement_2_source_data_1.xlsx]

## Sheet: Sheet1
Figrue S1b
TEER
Exp#1	To	T1
	652.666	2896.67
	287	1003.33
	490.666	2606.67
Exp#2	1869.33	2508.33
	2001.67	2380.33
Exp#3	2001.67	1606
	1851.33	2354.33
