# Supplementary material for: Nano-scale architecture of blood-brain barrier tight-junctions
Source: eLife journal article supplement (doi:10.7554/elife.63253), 2021-12-24
Supplement: supp [file elife-63253-supp-v1.zip › elife_poa_e63253_Figure_2_source_data_1.xlsx]

## Sheet: גיליון1
Figure 2e-f										Figrue 2a						Figure 2b
	day 0					day 2
	signals	clusret area in micrometer	densety			signals	clusret area in micrometer	densety		time(days)							10^-5 cm\min
	18	0.005944	3028.26			153	0.0233285	6558.5		1	618.987	209.44	362.133			T0	0.0217576	0.0145978	0.00727674	0.018369
	214	0.005844	36618.8			350	0.036244	9656.77		2	2802.24	1123.73	2660			T1	0.179354	0.16961	0.156491	0.206416
	1117	0.0258805	43159.9			1931	0.0877225	22012.6		3	2662.61	953.12	1742.35
	625	0.0126645	49350.5			4240	0.171105	24780.1		4	1711.36	733.6	1354.08
	2104	0.0892885	23564.1			2896	0.040735	71093.7		5	689.677	701.353	979.71
	24	0.010997	2182.41			4705	0.268819	17502.5		6	550.293	564.853	782.133
	11	0.004478	2456.45			1241	0.106938	11604.9		7	491.55	401.15	565
	16	0.006875	2327.27			144	0.0594885	2420.64		8	276.85	230.52	316.4
	16	0.0105625	1514.79			19	0.0143275	1326.12
	690	0.148849	4635.57			11	0.0066785	1647.08
	188	0.062401	3012.77			1438	0.111876	12853.5
	3461	0.216404	15993.2			3155	0.0788365	40019.5
	718	0.0235915	30434.7			3014	0.118918	25345.2
	1853	0.334718	5536			285	0.0986595	2888.72
	6868	0.244614	28076.9			599	0.123389	4854.55
	11	0.00716	1536.31			1094	0.140252	7800.25
	65	0.0435335	1493.1			884	0.076153	11608.2
	1813	0.039962	45368.1			1548	0.0841685	18391.7
	1514	0.0190125	79631.8			25	0.01578	1584.28
	2365	0.244063	9690.12			18	0.0088275	2039.08
	2710	0.181229	14953.4			2648	0.118023	22436.3
	72	0.046619	1544.43			21	0.0040835	5142.65
	1920	0.259722	7392.52			11	0.0033535	3280.16
	647	0.418727	1545.16			11	0.0060425	1820.44
	614	0.042149	14567.4			887	0.0051715	171517
	169	0.068832	2455.25			55	0.004407	12480.1
	83	0.0415355	1998.29			2395	0.033853	70747.1
	347	0.070962	4889.94			2292	0.0267005	85841.1
	1897	0.286116	6630.17			1631	0.0130905	124594
	767	0.162909	4708.16			871	0.0048135	180949
	155	0.080983	1913.98			39	0.017843	2185.73
	898	0.334228	2686.78			1128	0.172942	6522.42
	3051	0.382487	7976.74			173	0.095068	1819.75
	1148	0.1649	6961.8			1809	0.042584	42480.7
	638	0.004587	139089			1455	0.157618	9231.15
	1788	0.0191985	93132.3			2698	0.125824	21442.7
	521	0.025858	20148.5			10	0.0029945	3339.46
	2724	0.648215	4202.31			335	0.025754	13007.7
	42	0.0297355	1412.45			1967	0.0851075	23111.9
	353	0.067826	5204.49			2596	0.0409265	63430.8
	16	0.00672	2380.95			2335	0.0316925	73676.7
	88	0.054328	1619.79			1307	0.063835	20474.7
	2658	0.199975	13291.7			2065	0.0213615	96669.2
	16	0.0079285	2018.04			267	0.0324655	8224.11
	11	0.005987	1837.31			1048	0.0060605	172923
	1652	0.01646	100365			1477	0.0185585	79586.2
	843	0.081574	10334.2			875	0.007877	111083
	14	0.0081505	1717.69			1993	0.0459385	43384.1
	358	0.071803	4985.86			2494	0.0534945	46621.6
	295	0.107364	2747.67			1358	0.0141815	95758.6
	133	0.0781505	1701.84			1084	0.087849	12339.4
	1426	0.058869	24223.3			3449	0.12729	27095.6
	560	0.0298745	18745.1			1757	0.123411	14237
	58	0.0093955	6173.17			847	0.0491995	17215.6
	220	0.0876115	2511.09			2212	0.0342245	64632.1
	17	0.0105305	1614.36			1423	0.042816	33235.2
	188	0.076378	2461.44			4193	0.435472	9628.62
	1955	0.037403	52268.5			507	0.055799	9086.18
	2077	0.016404	126615			2949	0.0598355	49285.1
	2689	0.128663	20899.6			11	0.0013435	8187.57
	3725	0.189872	19618.4			974	0.153636	6339.66
	2861	0.229255	12479.6			352	0.0374275	9404.85
	2719	0.0921735	29498.7			3310	0.0940395	35198
	265	0.100697	2631.64			2962	0.058892	50295.5
	50	0.055314	903.93			2190	0.023504	93175.6
	12	0.0048	2500			776	0.008768	88503.6
	13	0.0059075	2200.59			3163	0.440681	7177.53
	23	0.011883	1935.54			1445	0.166663	8670.19
	451	0.11493	3924.13			91	0.038336	2373.75
	598	0.3806	1571.2			4079	0.162108	25162.2
	2075	0.0913065	22725.7			1755	0.208055	8435.27
	99	0.082958	1193.37			3149	0.18379	17133.6
	950	0.127969	7423.7			149	0.0710215	2097.96
	229	0.068952	3321.15			38	0.016036	2369.67
	70	0.0554875	1261.55			4381	0.0975345	44917.4
	424	0.061064	6943.53			14	0.003512	3986.33
	10	0.004426	2259.38			3243	0.0650955	49819.1
	257	0.078086	3291.24			371	0.125713	2951.18
	24	0.0213645	1123.36			2210	0.0665955	33185.4
	97	0.0646295	1500.86			1386	0.022532	61512.5
	199	0.015436	12891.9			506	0.0533955	9476.45
	1290	0.708296	1821.27			769	0.005298	145149
	164	0.148771	1102.37			24	0.004858	4940.3
	773	0.194062	3983.26			760	0.0676485	11234.5
	385	0.241876	1591.72			131	0.022284	5878.66
	140	0.090554	1546.04			540	0.0032845	164409
	16	0.0066245	2415.28			192	0.001486	129206
	68	0.0650225	1045.79			17	0.004738	3588.01
	1227	0.528418	2322.03			2021	0.142336	14198.8
	114	0.052514	2170.85			372	0.0871025	4270.83
						197	0.0442425	4452.73
						2493	0.150122	16606.5
						44	0.026885	1636.6
						65	0.022732	2859.41
						2104	0.025818	81493.5
						95	0.018902	5025.92
						246	0.016498	14910.9
						89	0.0046145	19287
						1268	0.0378555	33495.8
						11	0.005487	2004.74
						38	0.0022415	16952.9
						115	0.0011295	101815
						741	0.197402	3753.76
						1924	0.249814	7701.71
						135	0.0344245	3921.63
						44	0.025106	1752.57
						93	0.0333195	2791.16
						341	0.0135205	25221
						39	0.009007	4329.97
						84	0.0354145	2371.91
						145	0.0412445	3515.62
						1289	0.030037	42913.7
						20	0.009419	2123.37
						869	0.060811	14290.2
						2127	0.018085	117611
						865	0.0235795	36684.4
						1003	0.0057025	175888
						83	0.001248	66506.4
						47	0.001683	27926.3
						51	0.023461	2173.82
						3739	0.215668	17336.8
						17	0.007354	2311.67
						11	0.005178	2124.37
						123	0.034764	3538.14
						768	0.029323	26191
						29	0.0140375	2065.89
						1576	0.105598	14924.5
						67	0.008735	7670.29
						1740	0.0211115	82419.5
						2032	0.021524	94406.2
						39	0.014758	2642.63
						2903	0.0494775	58673.1
						38	0.014827	2562.89
						1015	0.008014	126653
						1663	0.021655	76795.2
						1228	0.009284	132271
						24	0.006459	3715.75
						389	0.007082	54928
						2043	0.087665	23304.6
						14	0.001286	10886.5
						130	0.0041275	31496.1
						29	0.0097055	2988
						24	0.009247	2595.44
						4365	0.219731	19865.2
						637	0.0201085	31678.1
						3719	0.205733	18076.8
						3205	0.153231	20916.1
						85	0.0432775	1964.07
						6267	0.294442	21284.3
						19	0.003879	4898.17
						1739	0.133464	13029.8
						216	0.0277085	7795.44
						2571	0.0566695	45368.3
						430	0.020008	21491.4
						32	0.003215	9953.34
						887	0.041224	21516.6
						3134	0.091567	34226.3
						1413	0.110442	12794
						2669	0.07373	36199.6
						44	0.0102265	4302.55
						2521	0.052198	48296.9
						220	0.0195285	11265.6
						263	0.009684	27158.2
						121	0.017448	6934.89
						427	0.031993	13346.7
						20	0.0100405	1991.93
						130	0.0400815	3243.39
						4750	0.411689	11537.8
						250	0.0551615	4532.15
						2657	0.0273615	97107.2
						484	0.0371495	13028.4
						4565	0.100578	45387.9
						3028	0.042741	70845.3
						616	0.004599	133942
						527	0.044567	11824.9
						4770	0.158268	30138.8
						10	0.000989	10111.2
						898	0.12482	7194.36
						60	0.0113025	5308.56
						4055	0.117916	34389
						3575	0.162839	21954.2
						12	0.0058055	2067.01
						49	0.017951	2729.65
						65	0.012817	5071.39
						2554	0.0390565	65392.4
						2904	0.079575	36493.9
						3102	0.0855075	36277.5
						3728	0.132786	28075.4
						3013	0.0688725	43747.5
						3220	0.03913	82289.8
						342	0.0088	38863.6
						351	0.026344	13323.7
						555	0.0355795	15598.9
						542	0.085602	6331.63
						64	0.0324355	1973.15
						1552	0.007951	195196
						10	0.0065775	1520.33
						1558	0.091378	17050.1
						379	0.033222	11408.1
						2360	0.0951125	24812.7
						1733	0.0819615	21144.1
						1620	0.072675	22291
						3223	0.095895	33609.7
						1926	0.021032	91574.7
						4592	0.155522	29526.4
						1364	0.123245	11067.4
						706	0.085028	8303.15
						2992	0.0570135	52478.8
						1984	0.04916	40358
						33	0.001975	16708.9
						1128	0.009828	114774
						860	0.008181	105122
						2885	0.076749	37590.1
						1378	0.01665	82762.8
						23	0.0055185	4167.8
						2344	0.14786	15852.8
						7885	0.962044	8196.1
						71	0.0130505	5440.4
						3945	0.162839	24226.4
						752	0.101154	7434.21
						7019	0.610183	11503.1
						3347	0.176569	18955.7
						13	0.0064	2031.25
						24	0.013487	1779.49
						63	0.0029315	21490.7
						545	0.077685	7015.51
						1526	0.0969915	15733.3
						1843	0.058165	31685.7
						1008	0.015157	66503.9
						302	0.033029	9143.48
						1808	0.0827505	21848.8
						1899	0.0669105	28381.2
						23	0.0072945	3153.06
						1574	0.0765885	20551.4
						14	0.005958	2349.78
						4099	0.130172	31489
						1922	0.027627	69569.6
						400	0.006378	62715.6
						1928	0.032994	58434.9
						4025	0.086586	46485.6
						784	0.0079245	98933.7
						693	0.0206685	33529.3
						1531	0.0663705	23067.5
						63	0.014807	4254.74
						3308	0.089726	36867.8
						2171	0.109794	19773.5
						2262	0.0592195	38196.9
						4586	0.401708	11416.3
						6916	0.249117	27762.1
						6410	0.334112	19185.2
						19	0.006795	2796.17
						2033	0.026495	76731.5
						3212	0.237015	13551.9
						1907	0.038951	48958.9
						2500	0.022426	111478
						380	0.045165	8413.59
						94	0.004155	22623.3
						1871	0.0226025	82778.5
						935	0.0136695	68400.5
						17	0.0050955	3336.28
						3063	0.108448	28244
						685	0.0048695	140672
						2495	0.038704	64463.6
						1716	0.01568	109439
						915	0.008864	103227
						700	0.042325	16538.7
						455	0.0767785	5926.14
						1251	0.0558485	22399.9
						2107	0.0340915	61804.3
						715	0.059072	12103.9
						2801	0.170791	16400.2
						1411	0.0747215	18883.5
						2538	0.0959225	26458.9
						2583	0.029286	88199.1
						139	0.0314025	4426.4
						4261	0.110983	38393.3
						339	0.0074195	45690.4
