# Supplementary material for: Nano-scale architecture of blood-brain barrier tight-junctions
Source: eLife journal article supplement (doi:10.7554/elife.63253), 2021-12-24
Supplement: supp [file elife-63253-supp-v1.zip › elife_poa_e63253_Figure_5_source_data_1.xlsx]

## Sheet: גיליון1
Figure 5c-d													Figure 5b.	E12					P9
E12							P9							signals	area in micrometer	signals/area			signals	area in micrometer	signals/area
signals	area in nanometr	area in micrometer	diameter	signals/diameter			signals	area in nanometr	area in micrometer	radius	signals/diameter			14	0.0038835	3605			16	0.021267	752.357
16898	138438400	138.438	11.766	1436.17			1622	21432689	21.4327	4.62955	350.358			22	0.0385905	570.088			35	0.049745	703.588
12208	61229790	61.2298	7.82495	1560.14			2834	18837324	18.8373	4.3402	652.966			61	0.011144	5473.8			1984	0.127108	15608.8
14703	133610371	133.61	11.559	1272			2297	22561797	22.5618	4.74993	483.586			2545	0.086212	29520.3			2000	0.036496	54800.5
11813	103755757	103.756	10.1861	1159.72			4072	63721069	63.7211	7.98255	510.113			532	0.060487	8795.28			2000	0.026314	76006.6
10735	109892000	109.892	10.4829	1024.04			5164	88800000	88.8	9.42338	547.999			41	0.0103055	3978.46			3336	0.441095	7563
15053	126586821	126.587	11.2511	1337.92			1858	31622400	31.6224	5.62338	330.406			3419	0.346558	9865.58			2042	0.233797	8734.07
12761	88857866	88.8579	9.42645	1353.74			5832	158720000	158.72	12.5984	462.915			4937	0.148107	33334.1			6252	2.34759	2663.15
12971	143360000	143.36	11.9733	1083.33			1627	33388800	33.3888	5.7783	281.57			798	0.110887	7196.48			4632	1.53808	3011.54
12015	122572800	122.573	11.0713	1085.24			1911	25903867	25.9039	5.08958	375.473			1039	0.042368	24523.2			3409	1.61559	2110.07
12928	159513600	159.514	12.6299	1023.61			2230	53254400	53.2544	7.29756	305.582			429	0.0916575	4680.47			658	0.378983	1736.23
6009	71131200	71.1312	8.43393	712.479			2208	7670800	7.6708	2.76962	797.221			33	0.005309	6215.86			10	0.014641	683.037
5046	72588800	72.5888	8.51991	592.26			2242	21668014	21.668	4.65489	481.644			745	0.06437	11573.7			24	0.044656	537.442
2833	58252800	58.2528	7.63235	371.183			2288	25536000	25.536	5.05332	452.772			3561	0.641316	5552.64			62	0.061614	1006.26
8032	63072000	63.072	7.94179	1011.36			981	19673600	19.6736	4.43549	221.17			8883	0.788488	11265.9			1984	0.17555	11301.6
12634	98940000	98.94	9.94686	1270.15			6707	39878400	39.8784	6.31493	1062.09			129	0.170995	754.408			3468	0.101521	34160.4
22340	183859200	183.859	13.5595	1647.56			6088	28224000	28.224	5.31263	1145.95			9802	0.738322	13276			67	0.010731	6243.88
23696	259072000	259.072	16.0957	1472.19			3797	36000000	36	6	632.833			23	0.032734	702.633			1848	0.060246	30674.5
12072	104339200	104.339	10.2147	1181.83			3239	19699200	19.6992	4.43838	729.771			14	0.021641	646.92			1976	0.143559	13764.4
24125	198908571	198.909	14.1035	1710.57			3350	35590400	35.5904	5.96577	561.537			33	0.0631985	522.164			24	0.008607	2788.59
15619	158505600	158.506	12.5899	1240.6			1690	18105600	18.1056	4.25507	397.173			276	0.076638	3601.35			2009	0.033039	60807.8
19192	130331659	130.332	11.4163	1681.11			3854	42672000	42.672	6.53238	589.984			984	0.205169	4796.05			5306	1.27887	4148.98
11308	110009976	110.01	10.4886	1078.13			7862	78159623	78.1596	8.84079	889.287			13	0.005653	2299.66			157	0.016586	9466.1
25456	212951146	212.951	14.5928	1744.42			4752	43571200	43.5712	6.60085	719.907			27	0.0531035	508.441			2000	0.07945	25173.1
23734	225049600	225.05	15.0017	1582.09			3983	13196309	13.1963	3.63267	1096.44			52	0.037647	1381.25			223	0.210144	1061.18
							1968	19482206	19.4822	4.41387	445.868			13	0.0178525	728.189			10	0.004943	2023.06
							4967	25748800	25.7488	5.07433	978.849			13	0.0162475	800.123			2029	0.118966	17055.4
							7526	56919267	56.9193	7.54449	997.55			177	0.2096	844.466			10	0.010755	929.843
														48	0.0323395	1484.25			2068	0.089071	23217.6
														11	0.0199025	552.694			4058	0.577426	7027.74
														454	0.201198	2256.49			1930	0.238031	8108.19
														25	0.037494	666.773			24	0.042147	569.436
														1751	0.172731	10137.1			2931	0.842567	3478.66
														350	0.094875	3689.06			3764	0.215116	17497.6
														171	0.0757715	2256.79			9483	2.60636	3638.4
														1364	0.161371	8452.6			1891	0.184735	10236.3
														102	0.0950275	1073.37			409	0.009369	43656.9
														24	0.045888	523.013			202	0.008566	23583
														1505	0.148182	10156.4			253	0.007715	32795.4
														14	0.008611	1625.83			231	0.086625	2666.68
														16	0.013799	1159.5			3083	0.259528	11879.3
														35	0.041357	846.29			331	0.011846	27943.1
														1495	0.113224	13203.9			3079	0.245217	12556.2
														95	0.021281	4464.08			15	0.013863	1082.02
														976	0.095183	10253.9			2000	0.037851	52839.5
														21	0.011629	1805.83			10	0.005538	1805.87
														6701	0.103986	64441.4			3732	0.162069	23027.2
														122	0.023203	5257.94			2138	0.233678	9149.36
														26	0.011653	2231.19			1897	0.137708	13775.6
														40	0.058059	688.954			254	0.012242	20749.1
														1043	0.186689	5586.83			10	0.011178	894.654
														34	0.033311	1020.68			5699	0.912395	6246.2
														86	0.027557	3120.8			2799	0.250605	11169
														11	0.0124765	881.658			359	0.078419	4578
														35	0.042569	822.195			19	0.006231	3049.51
														76	0.025699	2957.31			2335	0.132712	17594.6
														669	0.158654	4216.74			2264	0.181086	12502.4
														4712	0.459496	10254.7			2125	0.086229	24643.7
														3265	0.084899	38457.5			2518	0.116944	21531.7
														16	0.026544	602.773			4232	1.09892	3851.04
														197	0.257047	766.395			8119	1.84706	4395.62
														629	0.185224	3395.89			661	0.140786	4695.07
														2332	0.145116	16069.9			37	0.036116	1024.49
														245	0.152707	1604.37			47	0.072206	650.92
														6150	0.112796	54523.5			43	0.011393	3774.25
														10	0.012978	770.535			15	0.00225	6668.15
														140	0.192846	725.97			12	0.004989	2405.53
														17	0.008201	2072.92			11	0.006295	1747.56
														500	0.077352	6463.96			44	0.083023	529.974
														10	0.007538	1326.61			1185	0.393815	3009.03
														120	0.0390215	3075.23			11	0.009269	1186.82
														143	0.099336	1439.56			11	0.015531	708.284
														31	0.039863	777.663			3193	1.14206	2795.82
														10	0.006419	1557.88			945	0.632067	1495.1
														536	0.040746	13154.7			78	0.052591	1483.14
														300	0.209142	1434.43			63	0.041825	1506.28
														757	0.174868	4328.98			34	0.028632	1187.48
														15	0.0108875	1377.73			14	0.011704	1196.17
														904	0.331253	2729.03			10	0.004256	2349.62
														491	0.248911	1972.59			3903	0.915928	4261.25
														281	0.038173	7361.22			91	0.104868	867.762
														10	0.002574	3885			112	0.090326	1239.95
														5749	0.0727925	78977.9			1578	0.521001	3028.79
														394	0.0774655	5086.14			192	0.203204	944.866
														752	0.097883	7682.64			31	0.044019	704.249
														685	0.296706	2308.69			13	0.008267	1572.61
														16	0.018192	879.507			403	0.570299	706.647
														3222	0.036314	88726.1			65	0.080739	805.068
														10	0.003635	2751.03			311	0.2153	1444.5
														18	0.008146	2209.67			462	0.465096	993.343
														6268	0.089088	70357.4			355	0.272671	1301.94
														290	0.0167145	17350.2			127	0.106339	1194.29
														2140	0.066373	32242			27	0.051962	519.611
														575	0.0919515	6253.3			19	0.013819	1374.97
														181	0.357451	506.362			2000	0.023478	85187.9
														139	0.081391	1707.81			8843	7.00905	1261.65
														125	0.259255	482.151			172	0.141027	1219.63
														18	0.0433005	415.7			4040	1.8034	2240.21
														139	0.248258	559.901			46	0.07187	640.044
														11	0.0142215	773.477			377	0.136445	2763.02
														12	0.006841	1754.13			406	0.362634	1119.59
														58	0.0815595	711.137			8167	1.95756	4172.02
														28	0.050128	558.57			100	0.111574	896.27
														168	0.164373	1022.07			2396	0.342009	7005.67
														66	0.051097	1291.66			349	0.306383	1139.1
														56	0.0911005	614.706			70	0.017913	3907.89
														33	0.013459	2451.89			481	0.025721	18700.7
														193	0.213339	904.661			16	0.009077	1762.79
														32	0.0338605	945.054			905	0.35551	2545.64
														188	0.169589	1108.57			731	0.046738	15640.4
														267	0.209626	1273.69			97	0.04548	2132.81
														129	0.0096825	13323			1021	0.140203	7282.32
														2833	0.79609	3558.64			12	0.013499	888.988
														21	0.0441235	475.937			31	0.04942	627.283
														1179	0.183117	6438.49			2367	0.540587	4378.58
														548	0.14054	3899.25			3282	1.42372	2305.22
														8283	0.401979	20605.6			5493	5.08499	1080.24
														392	0.165581	2367.42			309	0.277398	1113.92
														146	0.110571	1320.42			17	0.044694	380.368
														190	0.153614	1236.87			191	0.259866	734.994
														8134	0.229463	35448			60	0.05657	1060.63
														1200	0.078515	15283.7			50	0.088053	567.84
														528	0.197801	2669.34			235	0.337727	695.829
														500	0.0528175	9466.56			51	0.094291	540.879
														1771	0.256885	6894.12			512	0.484718	1056.28
														38	0.0091245	4164.61			110	0.150435	731.213
														644	0.0359785	17899.6			56	0.091709	610.627
														991	0.104643	9470.29			749	0.18546	4038.62
														258	0.145956	1767.65			918	0.723909	1268.12
														558	0.206573	2701.22			47	0.080466	584.101
														12	0.007277	1649.03			514	0.491248	1046.32
														11	0.0030375	3621.4			310	0.151537	2045.7
														14748	0.663744	22219.4			129	0.130582	987.885
														14647	0.293154	49963.4			65	0.056458	1151.3
														84	0.0047945	17520.1			26	0.04225	615.392
														4595	0.0781445	58801.3			183	0.112308	1629.45
														7057	0.072072	97916			865	0.386758	2236.54
														140	0.0770965	1815.91			103	0.179051	575.257
														1844	0.0658165	28017.3			13	0.014461	899.001
														96	0.173309	553.924			749	0.253924	2949.71
														534	0.516786	1033.31			621	0.208541	2977.84
														20	0.0530565	376.957			926	0.482185	1920.42
														11	0.005212	2110.51			236	0.243844	967.832
														2467	0.111713	22083.4			1292	0.583494	2214.25
														1321	0.126198	10467.7			106	0.115209	920.071
														2805	0.0487625	57523.7			374	0.157898	2368.62
														516	0.284187	1815.7			1577	1.28025	1231.79
														457	0.024165	18911.6			66	0.0996	662.651
														57	0.077297	737.415			14	0.022176	631.327
														1579	0.203595	7755.59			145	0.171231	846.812
														9406	0.0810995	115981			124	0.167802	738.968
														11	0.009738	1129.6			35	0.052432	667.538
														52	0.059655	871.679			724	0.195408	3705.07
														13	0.014609	889.862			419	0.112728	3716.91
														32	0.0666065	480.434			1028	0.101721	10106.1
														5242	0.495864	10571.5			698	0.195908	3562.9
														15	0.016033	935.57			10	0.015877	629.842
														9406	0.0810995	115981			1202	0.555813	2162.6
														10	0.0046415	2154.48			664	0.176133	3769.89
														3136	0.248546	12617.4			98	0.125786	779.101
														423	0.951082	444.757			465	0.579573	802.316
														85	0.163072	521.244			442	0.247693	1784.47
														827	0.94696	873.321			1588	0.579439	2740.58
														433	0.504519	858.243			1571	0.326057	4818.18
														20	0.0530565	376.957			1137	0.96412	1179.31
														30	0.063086	475.541			1872	1.34026	1396.74
														12	0.0274245	437.565			730	0.395451	1845.99
														27481	1.45672	18865			21	0.048063	436.926
														17515	1.38089	12683.9			1012	0.318067	3181.72
														11774	0.473415	24870.4			2591	0.627727	4127.59
														2609	0.584013	4467.37			585	0.432868	1351.45
														518	0.0348195	14876.7			123	0.189094	650.47
														4180	0.132099	31642.9			138	0.192336	717.494
														136	0.0663195	2050.68			27	0.04854	556.248
														96	0.145121	661.517			2378	0.211776	11228.9
														10	0.0156475	639.08			15	0.011802	1270.97
														30	0.0529865	566.182			482	0.064956	7420.41
														5699	0.575835	9896.94			221	0.327037	675.765
														250	0.0121195	20627.9			325	0.183949	1766.8
														129	0.0601935	2143.09			199	0.17599	1130.75
														11	0.007202	1527.35			132	0.125847	1048.9
														5006	0.366656	13653.1			23	0.04745	484.726
														10	0.0055205	1811.43			481	0.395665	1215.68
														18068	0.71156	25392.1			237	0.207652	1141.34
														3944	0.0965015	40869.8			665	0.281181	2365.03
														4387	0.069849	62806.9			833	0.899694	925.871
														160	0.026998	5926.36			402	0.167602	2398.55
														4488	0.304879	14720.6			117	0.223035	524.582
														356	0.0982685	3622.73			301	0.284717	1057.19
														672	0.036592	18364.7			65	0.115873	560.961
														11	0.011199	982.231			12	0.020459	586.553
														98	0.215126	455.546			99	0.118414	836.053
														25	0.0626075	399.313			1408	1.08139	1302.03
														5190	0.262354	19782.4			2022	0.585341	3454.4
														229	0.495798	461.882			770	0.396577	1941.62
														12023	1.12752	10663.2			23	0.044861	512.695
														564	0.234933	2400.68			1163	0.65362	1779.32
														11	0.0122825	895.583			631	0.205944	3063.94
														1219	0.251368	4849.46			553	0.399668	1383.65
														78	0.0675935	1153.96			37	0.077729	476.013
														32	0.030765	1040.14			112	0.11993	933.882
														12	0.0168185	713.5			41	0.101647	403.357
														203	0.0447165	4539.71			2572	5.12485	501.869
														11	0.005046	2179.94			525	0.348499	1506.46
														268	0.0137625	19473.2			659	0.512926	1284.79
														153	0.0942675	1623.04			520	0.166304	3126.81
														15	0.015289	981.098			16	0.034412	464.954
														129	0.015992	8066.53			779	0.161569	4821.48
														194	0.0546985	3546.72			46	0.103169	445.873
														2528	0.140225	18028.2			1156	0.092503	12496.9
														6355	0.0500705	126921			1581	0.44685	3538.1
														3107	0.160938	19305.6			2235	0.534856	4178.69
														193	0.0151165	12767.5			3679	0.221927	16577.5
														108	0.0174005	6206.72			140	0.076929	1819.86
														293	0.058279	5027.54			149	0.008374	17794.2
														49	0.003296	14866.5			8995	0.02199	409059
														558	0.13159	4240.44			8999	0.046447	193748
														4706	0.210276	22380.2			58	0.014486	4003.87
														77	0.010093	7629.05			145	0.02659	5453.18
														23	0.0186565	1232.81			8998	0.029533	304676
														16682	0.883613	18879.3			9130	0.070377	129731
														6268	0.149213	42007.1			136	0.068502	1985.36
														31	0.010172	3047.58			9611	0.049484	194224
														190	0.0985565	1927.83			32	0.003414	9374.54
														1852	0.169273	10940.9			71	0.012873	5515.42
														34	0.0660475	514.781			32	0.0211	1516.59
														1377	0.190805	7216.77			9057	0.053954	167865
														37	0.0046325	7987.05			438	0.026244	16689.8
														89	0.0208405	4270.53			190	0.155894	1218.78
														67	0.063114	1061.57			175	0.018937	9241.41
														45	0.0109745	4100.41			14333	0.053918	265830
														20	0.0132405	1510.52			7065	0.224446	31477.5
														18	0.001507	11944.3			1668	0.101479	16436.9
														4176	0.198165	21073.3			104	0.031454	3306.42
														22	0.0160325	1372.21			7601	0.579195	13123.4
														310	0.24817	1249.14			4962	0.875068	5670.42
														4265	0.196875	21663.5			9041	1.5427	5860.52
														3544	0.107799	32876			5964	0.167432	35620.4
														14888	0.418578	35568			18	0.028266	636.819
														12	0.0087065	1378.28			986	0.126703	7782.01
														2331	0.0572775	40696.6			30	0.019886	1508.6
														824	0.00809	101854			4463	0.678337	6579.33
														319	0.0105475	30244.1			5444	0.496118	10973.2
														147	0.0158875	9252.56			1050	0.538371	1950.33
														252	0.0064645	38982.1			171	0.119467	1431.36
														14	0.0046585	3005.26			18	0.033053	544.588
														53	0.00324	16358
														152	0.0080735	18827
														1077	0.008406	128123
														25	0.0173485	1441.05
														380	0.008416	45152.1
														17	0.0029885	5688.47
														6772	0.055638	121715
														220	0.034563	6365.19
														14	0.0081645	1714.74
														16	0.0016565	9658.92
														10	0.001681	5948.84
														385	0.0231615	16622.4
														3423	0.122809	27872.7
														204	0.019407	10511.7
														381	0.013149	28975.6
														8002	0.215253	37174.8
														734	0.135607	5412.68
														49	0.0189235	2589.37
														16	0.0032115	4982.1
														87	0.007298	11921.1
														744	0.151751	4902.77
														732	0.0804065	9103.74
														35	0.065544	533.992
														37	0.0080285	4608.58
														21	0.0005715	36745.4
														360	0.0202035	17818.7
														4245	0.2029	20921.7
														12	0.002669	4496.07
														7540	0.0623525	120925
														11	0.0029265	3758.76
														128	0.007529	17000.9
														21	0.005475	3835.62
														29	0.0082925	3497.14
														1331	0.126284	10539.7
														555	0.049088	11306.2
														182	0.005825	31244.6
														406	0.0195755	20740.2
														12	0.0020005	5998.5
														796	0.158711	5015.41
														8831	0.304464	29005.1
														8639	0.0632595	136564
														3107	0.139469	22277.3
														50	0.0014495	34494.7
														6207	0.084869	73136.2
														311	0.239787	1296.98
														248	0.0564095	4396.42
														17	0.00431	3944.32
														441	0.054031	8161.98
														15	0.0178875	838.574
														2753	0.222044	12398.4
														46	0.0084245	5460.26
														10294	0.223649	46027.5
														11	0.0029505	3728.18
														23	0.004439	5181.35
														220	0.0565985	3887.03
														25	0.0196955	1269.33
														179	0.104124	1719.1
														67	0.0762235	878.994
														13	0.0009955	13058.8
														275	0.0102805	26749.7
														62	0.003893	15926
														1796	0.0594615	30204.4
														128	0.0088795	14415.2
														753	0.0522385	14414.7
														4962	0.289403	17145.6
														3813	0.055629	68543.4
														4614	0.091185	50600.4
														38	0.0810605	468.786
														33	0.029218	1129.44
														204	0.0208485	9784.88
														1872	0.42947	4358.87
														330	0.054807	6021.13
														49	0.023621	2074.43
														22	0.0120095	1831.88
														21	0.0200375	1048.03
														10	0.003798	2632.96
														12	0.002122	5655.04
														4638	0.204664	22661.5
														16	0.016819	951.305
														614	0.169329	3626.08
														124	0.033275	3726.52
														12	0.001643	7303.71
														2096	0.162391	12907.1
														15	0.002932	5115.96
														11	0.001179	9329.94
														43	0.0289235	1486.68
														146	0.0284495	5131.9
														497	0.0529235	9390.91
														1381	0.0468465	29479.3
														30	0.0063575	4718.84
														3425	0.157454	21752.4
														31	0.012654	2449.82
														11	0.002398	4587.16
														228	0.101073	2255.78
														105	0.020138	5214.02
														5011	0.150718	33247.5
														112	0.209769	533.921
														24	0.040489	592.754
														55	0.094649	581.094
														113	0.120784	935.554
														691	0.123209	5608.33
														12	0.00318	3773.58
														1307	0.058067	22508.5
														13403	0.861658	15554.9
														616	0.097639	6308.95
														32	0.0124135	2577.84
														105	0.0410695	2556.64
														3222	0.105358	30581.3
														87	0.02006	4336.99
														681	0.0478405	14234.8
														6749	0.113874	59267.3
														177	0.022182	7979.44
														53	0.0295945	1790.87
														19	0.005441	3492.01
														401	0.520817	769.945
														222	0.165898	1338.17
														345	0.0930605	3707.27
														88	0.056842	1548.15
														122	0.221744	550.184
														132	0.227646	579.849
														333	0.103606	3214.12
														299	0.193283	1546.95
														1703	0.3652	4663.2
														426	0.130709	3259.15
														22195	0.747824	29679.4
														83	0.058593	1416.55
														75	0.0548315	1367.83
														13	0.0247955	524.289
														72	0.0386605	1862.37
														40	0.0658225	607.695
														40	0.0552195	724.382
														1490	0.198019	7524.53
														1798	0.100293	17927.5
														2567	0.0908475	28256.1
														18	0.0200305	898.63
														10	0.0104275	959.003
														6548	0.118323	55339.8
														127	0.09327	1361.64
														127	0.0345365	3677.27
														28	0.009644	2903.36
														2185	0.125717	17380.3
														38	0.03636	1045.1
														2080	0.026552	78336.8
														26	0.004028	6454.82
														10	0.0159185	628.2
														11	0.0044295	2483.35
														235	0.011065	21238.1
														10	0.007499	1333.51
														16	0.023826	671.535
														27	0.0025355	10648.8
														28	0.0056585	4948.31
														408	0.021568	18916.9
														1149	0.09653	11903
														267	0.045897	5817.37
														3035	0.091906	33022.9
														950	0.134883	7043.11
														8334	0.138182	60311.8
														739	0.18294	4039.58
														220	0.212626	1034.68
														319	0.524768	607.887
														217	0.282178	769.017
														219	0.440681	496.958
														10	0.009725	1028.28
														107	0.117665	909.361
														2435	0.343662	7085.45
														24	0.045647	525.774
														11	0.012967	848.307
														17	0.0288445	589.367
														11893	0.347656	34209.1
														4638	0.070065	66195.7
														1142	0.157362	7257.15
														16	0.0087855	1821.18
														93	0.043408	2142.46
														188	0.087049	2159.7
														44	0.107181	410.521
														230	0.100603	2286.2
														1212	0.069453	17450.7
														12	0.0114025	1052.4
														10	0.005108	1957.71
														338	0.152887	2210.78
														230	0.0991695	2319.26
														13	0.020095	646.927
														236	0.0733175	3218.88
														10219	0.247927	41217.8
														183	0.0164195	11145.3
														758	0.0525155	14433.8
														261	0.200178	1303.84
														103	0.025322	4067.61
														26	0.0292845	887.842
														629	0.041184	15272.9
														8783	0.512563	17135.4
														21	0.0020795	10098.6
														294	0.118473	2481.57
														8405	0.094828	88634.2
														330	0.27069	1219.11
														29	0.0134815	2151.1
														10	0.0167075	598.534
														16	0.021253	752.835
														166	0.121951	1361.2
														10	0.015592	641.355
														26	0.042646	609.67
														1863	0.196024	9503.91
														4863	0.945341	5144.18
														1205	0.517539	2328.33
														8683	1.26511	6863.43
														76	0.126129	602.56
														163	0.263921	617.609
														20	0.0498345	401.328
														5058	1.11433	4539.06
														25078	21.1171	1187.57
														1443	0.477224	3023.74
														174	0.099852	1742.58
														93	0.129612	717.523
														463	0.411325	1125.63
														250	0.147563	1694.19
														2213	0.543129	4074.54
														6315	1.83793	3435.94
														39	0.0640815	608.6
														27	0.024318	1110.29
														2393	0.355566	6730.11
														1754	0.554297	3164.37
														363	0.146768	2473.28
														6226	1.60922	3868.96
														24	0.018227	1316.73
														4867	0.181902	26756.1
														128	0.118167	1083.21
														59	0.188841	312.432
														828	0.405546	2041.69
														415	0.133474	3109.21
														137	0.092972	1473.56
														7868	0.831341	9464.23
														142	0.18723	758.425
														2105	0.156171	13478.8
														211	0.143888	1466.42
														71	0.116154	611.255
														823	0.217653	3781.25
														18	0.023214	775.394
														963	0.162154	5938.82
														29	0.0150465	1927.36
														847	0.230018	3682.31
														293	0.629785	465.238
														2157	0.152848	14112.1
														1712	0.302766	5654.54
														418	0.256439	1630.01
														786	0.326755	2405.48
														877	1.13789	770.726
														169	0.318088	531.299
														13	0.0152805	850.758
														17	0.014287	1189.89
														13942	2.37636	5866.95
														72	0.176615	407.668
														13	0.0244025	532.732
														390	0.505705	771.201
														1525	0.232199	6567.64
														1231	0.336825	3654.72
														716	0.0877605	8158.57
														511	0.075749	6745.96
														939	0.309634	3032.62
														126	0.0611455	2060.66
														4516	0.797067	5665.78
														174	0.0777805	2237.06
														32	0.0129305	2474.77
														291	0.109067	2668.07
														20	0.0241585	827.866
														92	0.144007	638.858
														25	0.046302	539.933
														15	0.01756	854.214
														6172	1.13016	5461.2
														379	0.117497	3225.61
														1154	1.22054	945.485
														472	0.54883	860.011
														77	0.0985265	781.516
														5380	0.873096	6161.98
														9609	0.61244	15689.7
														3080	0.657158	4686.85
														775	0.397201	1951.15
														3133	0.781344	4009.75
														106	0.111695	949.017
														209	0.222631	938.773
														39	0.0462275	843.654
														24	0.033863	708.738
														34	0.061292	554.722
														106	0.038882	2726.2
														266	0.178739	1488.2
														1270	1.16267	1092.31
														225	0.38142	589.902
														2050	0.134383	15254.8
														3575	0.300223	11907.8
														1101	0.242509	4540.03
														3179	0.348124	9131.8
														11315	0.187371	60388.2
														12308	1.10914	11096.9
														11	0.0120715	911.237
														508	0.275863	1841.49
														4127	0.138372	29825.5
														13271	1.33115	9969.59
														19	0.011246	1689.49
														30	0.0564755	531.204
														51	0.065194	782.281
														158	0.090636	1743.24
														207	0.118257	1750.43
														10372	3.86418	2684.14
														21	0.0085125	2466.96
														451	0.122069	3694.62
														7685	2.55919	3002.91
														19	0.031268	607.65
														7641	2.65843	2874.25
														857	0.234321	3657.37
														366	0.364704	1003.55
														353	0.0831755	4244.04
														165	0.16401	1006.04
														5321	0.39656	13417.9
														20	0.0092415	2164.15
														245	0.137819	1777.7
														44	0.0989025	444.883
														52	0.12971	400.896
														19	0.0194455	977.09
														14	0.0213405	656.03
														7747	0.962831	8046.06
														1238	0.0774685	15980.7
														1281	0.167407	7651.99
														11	0.005736	1917.71
														10	0.005713	1750.39
														6499	0.606002	10724.4
														7751	0.318435	24341
														839	0.373085	2248.82
														85	0.104456	813.736
														634	0.228049	2780.1
														787	0.0876965	8974.13
														97	0.0932615	1040.09
														1092	0.178414	6120.61
														11	0.0099075	1110.27
														63	0.0927415	679.308
														28	0.032992	848.691
														11	0.006465	1701.47
														1164	0.289428	4021.73
														7880	1.18186	6667.48
														105	0.10584	992.068
														58	0.080715	718.578
														140	0.139499	1003.59
														465	0.0946175	4914.52
														33	0.032414	1018.08
														99	0.048974	2021.48
														2958	0.228099	12968.1
														297	0.136612	2174.04
														200	0.104217	1919.08
														1874	0.475008	3945.2
														354	0.333255	1062.25
														13	0.0190875	681.074
														1429	0.229949	6214.42
														40777	24.2853	1679.08
														20505	10.303	1990.2
														4469	1.162	3845.95
														10750	2.10269	5112.49
														73	0.113839	641.257
														122	0.084696	1440.45
														27	0.034776	776.398
														77	0.101791	756.448
														175	0.180309	970.556
														19	0.028205	673.639
														79	0.078162	1010.72
														16	0.039982	400.18
														13	0.019867	654.351
														45	0.097134	463.278
														75	0.118616	632.29
														63	0.0391575	1608.89
														3022	0.350508	8621.77
														125	0.101893	1226.78
														15	0.023191	646.803
														18018	8.5483	2107.79
														7796	5.2245	1492.2
														1027	0.275013	3734.37
														160	0.235972	678.047
														7072	2.99918	2357.98
														7147	3.13624	2278.85
														564	0.245883	2293.77
														102	0.129273	789.028
														1138	0.684824	1661.74
														49	0.121853	402.124
														359	0.15365	2336.47
														7801	1.27522	6117.36
														11	0.0169275	649.83
														96	0.148247	647.568
														10	0.009143	1093.73
														117	0.0718925	1627.43
														29	0.0515195	562.894
														21	0.0498285	421.446
														7203	0.976294	7377.9
														11	0.0016895	6510.8
														226	0.367241	615.401
														3483	0.218747	15922.5
														1086	0.694121	1564.57
														778	0.359227	2165.76
														4232	2.28991	1848.1
														14	0.02349	595.998
														553	0.596967	926.349
														117	0.217505	537.917
														125	0.232657	537.272
														2355	0.176985	13306.2
														96	0.115738	829.46
														2044	0.478675	4270.13
														277	0.218239	1269.25
														206	0.158636	1298.57
														5324	0.398866	13347.8
														2948	0.128645	22915.8
														108	0.0904485	1194.05
														532	0.0894505	5947.42
														1041	0.131861	7894.68
														184	0.124453	1478.47
														66	0.138435	476.758
														4290	0.726279	5906.82
