# Supplementary material for: Nano-scale architecture of blood-brain barrier tight-junctions
Source: eLife journal article supplement (doi:10.7554/elife.63253), 2021-12-24

**Figure 6-figure supplement 2**

**Claudin-5 clusters are in close proximity to ER and lysosomal markers**

**a**

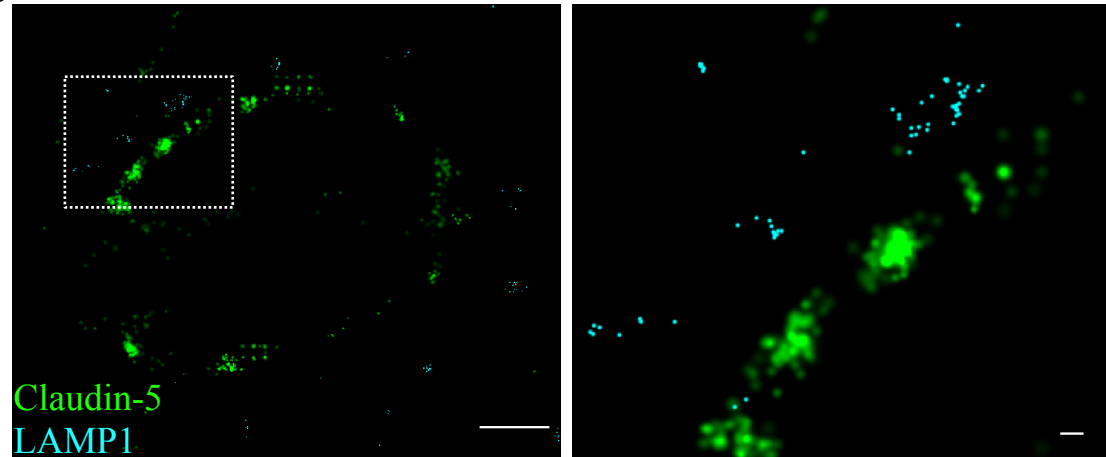

**b**

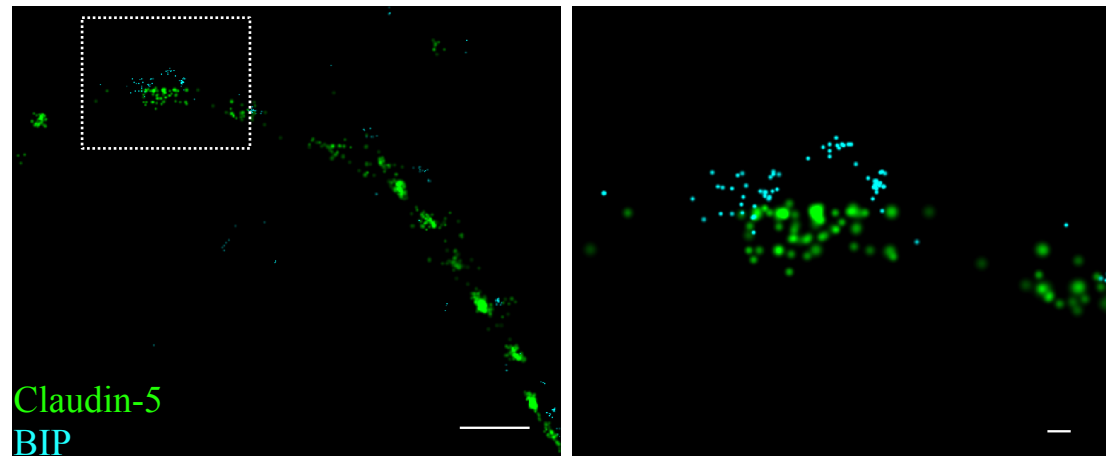

Supplement: supp [file elife-63253-supp-v1.zip › elife_poa_e63253_Figure_6_figure_supplement_2.pdf]
