# Supplementary material for: Nano-scale architecture of blood-brain barrier tight-junctions
Source: eLife journal article supplement (doi:10.7554/elife.63253), 2021-12-24
Supplement: supp [file elife-63253-supp-v1.zip › elife_poa_e63253_Figure_6_source_data_1.xlsx]

## Sheet: גיליון1
	Figure 6c
	e12 coupled with ZO1				e12 uncoupled with ZO1				p9 coupled with ZO1				p9 uncoupled with ZO1
	signals	area	densety		signals	area	densety		signals	area	densety		signals	area	densety
	19	0.026645	713.079		18	0.0048725	3694.2		193	0.055507	3477.04		32	0.0598165	534.969
	178	0.215621	825.521		532	0.116165	4579.69		941	0.226615	4152.41		28	0.026611	1052.2
	58	0.094154	616.012		13	0.004474	2905.68		368	0.240035	1533.11		20	0.016836	1187.93
	56	0.111854	500.65		17	0.008863	1918.09		11	0.0088055	1249.22		10	0.0047975	2084.42
	19	0.036014	527.573		439	0.139166	3154.51		394	0.068438	5757.04		259	0.158862	1630.35
	263	0.449988	584.46		620	0.20082	3087.35		1243	0.0534845	23240.4		422	0.321864	1311.11
	25	0.0644205	388.075		80	0.153833	520.044		1129	0.052382	21553.2		131	0.183499	713.9
	32	0.058166	550.15		831	0.362696	2291.18		1601	0.217428	7363.34		127	0.173704	731.129
	18	0.031625	569.17		163	0.120424	1353.56		29	0.030348	955.582		58	0.0798715	726.166
	541	0.349321	1548.72		42	0.080851	519.474		30	0.0448485	668.919		19	0.017041	1114.96
	1462	0.640181	2283.73		115	0.0832545	1381.31		30	0.008451	3549.88		993	0.35055	2832.69
	1312	0.580418	2260.44		12	0.0146475	819.252		269	0.054214	4961.82
	13	0.016139	805.502		18	0.0226645	794.194		47	0.0756895	620.958
	1225	0.758498	1615.03		95	0.136495	695.996		428	0.171976	2488.72
	66	0.0345535	1910.08		115	0.144337	796.749		18	0.0067065	2683.96
	1068	0.495638	2154.8		63	0.0863885	729.264		33	0.005835	5655.53
	337	0.182367	1847.92		20	0.015663	1276.89		965	0.0786455	12270.3
	355	0.34272	1035.83		537	0.177037	3033.27		44	0.003245	13559.3
	635	0.299705	2118.75		265	0.165292	1603.23		521	0.187424	2779.79
	46	0.083126	553.377		36	0.0408	882.353		352	0.130658	2694.07
					28	0.0481935	580.991		481	0.274606	1751.6
					1039	0.958035	1084.51		1186	1.36964	865.924
					23	0.038177	602.457		12	0.003269	3670.85
									373	0.183137	2036.73
									59	0.0591775	997.001
									278	0.192445	1444.56
									260	0.154628	1681.45
									721	0.374327	1926.12
									34	0.064159	529.933
									22	0.0376885	583.732
			1170.44				1665.4				4556.75				1265.44
