# Supplementary material for: Nano-scale architecture of blood-brain barrier tight-junctions
Source: eLife journal article supplement (doi:10.7554/elife.63253), 2021-12-24
Supplement: supp [file elife-63253-supp-v1.zip › elife_poa_e63253_Figure_7_source_data_1.xlsx]

## Sheet: גיליון1
Figrue 7d
	occlodin on ko						occlodin on wt						zo1 on ko					zo1 on wt
	signal	area	scop	densety over the scope			signal	area	scop	densety over the scope			signal	area	scop	densety over the scope		signal	area	scop	densety over the scope
	3759	102.027	31.7327	118.458			4121	232.32	47.8843	86.0616			5696	102.027	31.7327	179.499		4916	232.32	47.8843	102.664
	1916	31.9861	17.7677	107.836			1456	54.4896	23.1903	62.7848			2091	31.9861	17.7677	117.686		3617	54.4896	23.1903	155.97
	3318	56.1612	23.5433	140.932			3870	114.861	33.6694	114.941			3340	56.1612	23.5433	141.866		1823	114.861	33.6694	54.1441
	5840	238.855	48.5531	120.281			2752	74.336	27.0863	101.601			2817	238.855	48.5531	58.0189		1888	74.336	27.0863	69.7032
	4805	150.701	38.5663	124.591			1092	45.6	21.2145	51.4743			2816	150.701	38.5663	73.0172		423	45.6	21.2145	19.9392
	8240	305.933	54.9494	149.956			3282	81.696	28.3955	115.581			13648	305.933	54.9494	248.374		2972	81.696	28.3955	104.664
	1470	45.056	21.0876	69.7094			230	42.72	20.5336	11.2011			1672	45.056	21.0876	79.2885		2138	42.72	20.5336	104.122
	4116	89.4976	29.7205	138.49			2265	87.6544	29.4128	77.0072			4127	89.4976	29.7205	138.861		533	87.6544	29.4128	18.1213
	4891	215.04	46.0691	106.167			3880	115.072	33.7004	115.132			6833	215.04	46.0691	148.321		1436	115.072	33.7004	42.6108
	2299	62.72	24.8801	92.403			1131	81.1008	28.2919	39.9761			1674	62.72	24.8801	67.2826		2143	81.1008	28.2919	75.746
	4228	98.8366	31.2326	135.371			4315	144.922	37.8196	114.094			2070	98.8366	31.2326	66.2768		2893	144.922	37.8196	76.4948
	3591	73.6862	26.9676	133.16			4754	234.49	48.1074	98.8206			3240	73.6862	26.9676	120.144		6772	234.49	48.1074	140.768
	2465	81.8688	28.4256	86.7177			2082	77.0048	27.5682	75.5217			2608	81.8688	28.4256	91.7484		3610	77.0048	27.5682	130.948
	5216	93.4528	30.3701	171.748			1185	61.4656	24.6301	48.1119			5368	93.4528	30.3701	176.753		847	61.4656	24.6301	34.3888
	4237	56.0617	23.5225	180.126			3199	114.048	33.5501	95.35			4231	56.0617	23.5225	179.871		2401	114.048	33.5501	71.5646
	2853	107.525	32.5766	87.5782			2609	127.296	35.4452	73.6066			1980	107.525	32.5766	60.7798		6999	127.296	35.4452	197.46
	6445	105.638	32.2895	199.601			2477	84.4032	28.8622	85.8216			3826	105.638	32.2895	118.491		2584	84.4032	28.8622	89.5289
	7818	178.214	41.9393	186.412			3160	85.8048	29.1008	108.588			3666	178.214	41.9393	87.412		1076	85.8048	29.1008	36.9749
	4728	74.1888	27.0595	174.726			1315	55.776	23.4625	56.047			8119	74.1888	27.0595	300.043		1162	55.776	23.4625	49.5259
	1555	62.72	24.8801	62.4996			1208	54.7136	23.2379	51.984			1657	62.72	24.8801	66.5993		2739	54.7136	23.2379	117.868
	1707	25.0995	15.7392	108.455			2059	71.0528	26.4814	77.7528			1069	25.0995	15.7392	67.9197		2989	71.0528	26.4814	112.872
	2210	44.7984	21.0272	105.102			5886	57.2032	23.7607	247.72			1118	44.7984	21.0272	53.1693		7833	57.2032	23.7607	329.661
	2580	67.1616	25.746	100.21			3008	62.0864	24.7542	121.515			4011	67.1616	25.746	155.791		5130	62.0864	24.7542	207.238
	2826	50.6688	22.3625	126.372			1242	25.8048	15.9588	77.8254			2739	50.6688	22.3625	122.482		1253	25.8048	15.9588	78.5147
	2248	40.9088	20.0936	111.876			4211	81.8931	28.4298	148.119			1583	40.9088	20.0936	78.7812		4868	81.8931	28.4298	171.229
	2466	90.9312	29.9576	82.3165			4137	102.004	31.7292	130.385			2826	90.9312	29.9576	94.3335		10372	102.004	31.7292	326.891
	2269	60.6464	24.4654	92.7432			3693	41.4592	20.2283	182.566			1468	60.6464	24.4654	60.0031		2372	41.4592	20.2283	117.261
	3298	96.512	30.8632	106.859			4383	52.768	22.821	192.06			8817	96.512	30.8632	285.68		4973	52.768	22.821	217.913
	2519	67.872	25.8818	97.3269			1646	27.4688	16.4653	99.9678			3928	67.872	25.8818	151.767		1553	27.4688	16.4653	94.3196
	1379	49.3312	22.0653	62.4962			5646	156.672	39.3229	143.58			1644	49.3312	22.0653	74.506		9122	156.672	39.3229	231.977
	895	22.6432	14.9492	59.8693			3738	30.2848	17.2887	216.211			1404	22.6432	14.9492	93.9179		1836	30.2848	17.2887	106.197
	942	24.4992	15.5498	60.5794			8369	151.91	38.7207	216.137			1282	24.4992	15.5498	82.4446		8755	151.91	38.7207	226.106
	4557	107.52	32.5758	139.889			4034	90.592	29.9016	134.909			7220	107.52	32.5758	221.637		2077	90.592	29.9016	69.4611
	923	57.152	23.7501	38.863			2232	77.9712	27.7407	80.4595			731	57.152	23.7501	30.7788		2013	77.9712	27.7407	72.5649
	2018	91.808	30.1016	67.0395			829	62.1258	24.762	33.4787			4096	91.808	30.1016	136.072		322	62.1258	24.762	13.0038
	1510	39.936	19.8533	76.058			1090	107.187	32.5253	33.5124			3041	39.936	19.8533	153.174		1841	107.187	32.5253	56.6021
	1301	53.9136	23.0674	56.3999			675	104.832	32.166	20.9849			318	53.9136	23.0674	13.7857		1414	104.832	32.166	43.9595
	593	60.3776	24.4111	24.2922			946	87.648	29.4118	32.164			2401	60.3776	24.4111	98.3568		2622	87.648	29.4118	89.148
	855	36.6976	19.0313	44.926			1360	136.512	36.7059	37.0513			241	36.6976	19.0313	12.6633		3402	136.512	36.7059	92.6828
	1045	84.8	28.93	36.1217			700	62.8992	24.9157	28.0948			1580	84.8	28.93	54.6147		1206	62.8992	24.9157	48.4033
	2720	36.9408	19.0943	142.451			405	32.384	17.8778	22.6537			1919	36.9408	19.0943	100.501		2054	32.384	17.8778	114.891
	1669	79.5072	28.0126	59.5804			397	26.112	16.0535	24.7298			3489	79.5072	28.0126	124.551		892	26.112	16.0535	55.5642
	4879	133.325	36.2748	134.501			536	56.9184	23.7015	22.6146			3422	133.325	36.2748	94.3354		2393	56.9184	23.7015	100.964
	1205	47.3088	21.6083	55.7656			1245	66.5984	25.6379	48.561			1398	47.3088	21.6083	64.6973		2239	66.5984	25.6379	87.3318
	2180	47.424	21.6346	100.764			691	72.7552	26.7967	25.7867			1449	47.424	21.6346	66.976		2796	72.7552	26.7967	104.341
	7504	99.008	31.2597	240.053			214	73.6896	26.9683	7.93525			3206	99.008	31.2597	102.56		2080	73.6896	26.9683	77.1277
	3850	85.3248	29.0193	132.67			629	80.96	28.2674	22.2518			5401	85.3248	29.0193	186.117		2007	80.96	28.2674	71.0006
	2677	48.1536	21.8004	122.796			907	80.2944	28.1509	32.2192			2707	48.1536	21.8004	124.172		1513	80.2944	28.1509	53.746
	4228	82.336	28.5066	148.317									5634	82.336	28.5066	197.639
	5665	193.139	43.6601	129.752									2891	193.139	43.6601	66.216
	1446	111.507	33.1743	43.588									3297	111.507	33.1743	99.3843
	1842	31.6784	17.682	104.174									3017	31.6784	17.682	170.625
	2265	57.792	23.8827	94.8385									4305	57.792	23.8827	180.256
	3684	98.56	31.1889	118.119									2189	98.56	31.1889	70.1852
	5757	106.629	32.4406	177.463									5591	106.629	32.4406	172.346
	2250	52.896	22.8487	98.4739									2391	52.896	22.8487	104.645
