# Supplementary material for: Nano-scale architecture of blood-brain barrier tight-junctions
Source: eLife journal article supplement (doi:10.7554/elife.63253), 2021-12-24
Supplement: supp [file elife-63253-supp-v1.zip › elife_poa_e63253_Figure_8_source_data_1.xlsx]

## Sheet: גיליון1
Figure 8b
	e12 dextran						e16 dextran						p9 dextran
	signals	area in micrometer	densety	signal/ mean densety of p9			signals	area in micrometer	densety	signal/ mean densety of p9			signals	area in micrometer	densety	signal/ mean densety of p9
	58	10.8104	5.36522	6.89718			10	10.651	0.938879	1.20696			17	10.651	1.59609	2.05184
	32	10.174	3.14527	4.04336			16	10.651	1.50221	1.93114			10	10.8104	0.925038	1.18917
	39	10.8104	3.60765	4.63776			4	10.651	0.375552	0.482785			21	10.651	1.97165	2.53462
	98	10.8104	9.06537	11.6539			11	10.651	1.03277	1.32766			0	10.651	0	0
	41	10.1883	4.02423	5.17329			2	10.651	0.187776	0.241393			13	10.651	1.22054	1.56905
	9	10.1883	0.883367	1.1356			3	10.34	0.290135	0.37298			10	10.651	0.938879	1.20696
	66	10.651	6.1966	7.96596			0	10.34	0	0			4	10.651	0.375552	0.482785
	62	10.451	5.93245	7.62638			4	10.651	0.375552	0.482785			1	10.651	0.0938879	0.120696
	51	10.027	5.08627	6.53858			3	10.651	0.281664	0.362089			0	10.651	0	0
	48	10.027	4.78707	6.15396			4	10.651	0.375552	0.482785			7	10.651	0.657215	0.844874
Figrue 8c
	e12 sulfo						e16 sulfo						p9 sulfo
	signals	area in micron	densety	densety/ mean p9			signals	area in micron	densety	densety/ mean p9			signals	area in micron	densety	densety/ mean p9
	5859	41.2923	139.325	58.743			2873	42.0526	68.3192	28.805			261	42.0526	6.20651	2.61682
	8988	41.2923	213.732	90.1148			1525	42.0526	36.2641	15.2898			8	42.0526	0.190238	0.080209
	3239	41.2923	77.0226	32.4746			1060	42.0526	25.2065	10.6277			78	42.0526	1.85482	0.782037
	3160	41.2923	75.144	31.6825			2889	42.0526	68.6997	28.9655			102	42.0526	2.42553	1.02266
	1560	41.2923	37.0964	15.6407			1540	42.0526	36.6208	15.4402			246	42.0526	5.84982	2.46643
	3047	40.468	75.2941	31.7458			849	40.468	20.9795	8.84549			223	40.468	5.51053	2.32337
	6895	40.468	170.382	71.837			2499	40.143	62.2524	26.2472			37	40.468	0.914303	0.385492
	6126	40.143	151.379	63.825			810	40.468	20.0158	8.43916			0	40.468	0	0
	1100	40.468	27.182	11.4606			981	40.468	24.2414	10.2208			19	40.468	0.469507	0.197956
	1284	40.468	31.7288	13.3776			605	40.468	14.9501	6.30332			12	40.468	0.296531	0.125025
