# Supplementary figures and images for: Nano-scale architecture of blood-brain barrier tight-junctions
Source: eLife journal article supplement (doi:10.7554/elife.63253), 2021-12-24

## Figure 6-figure supplement 1

### Molecular organization of ZO1 and occludin in mouse cortical BBB TJs

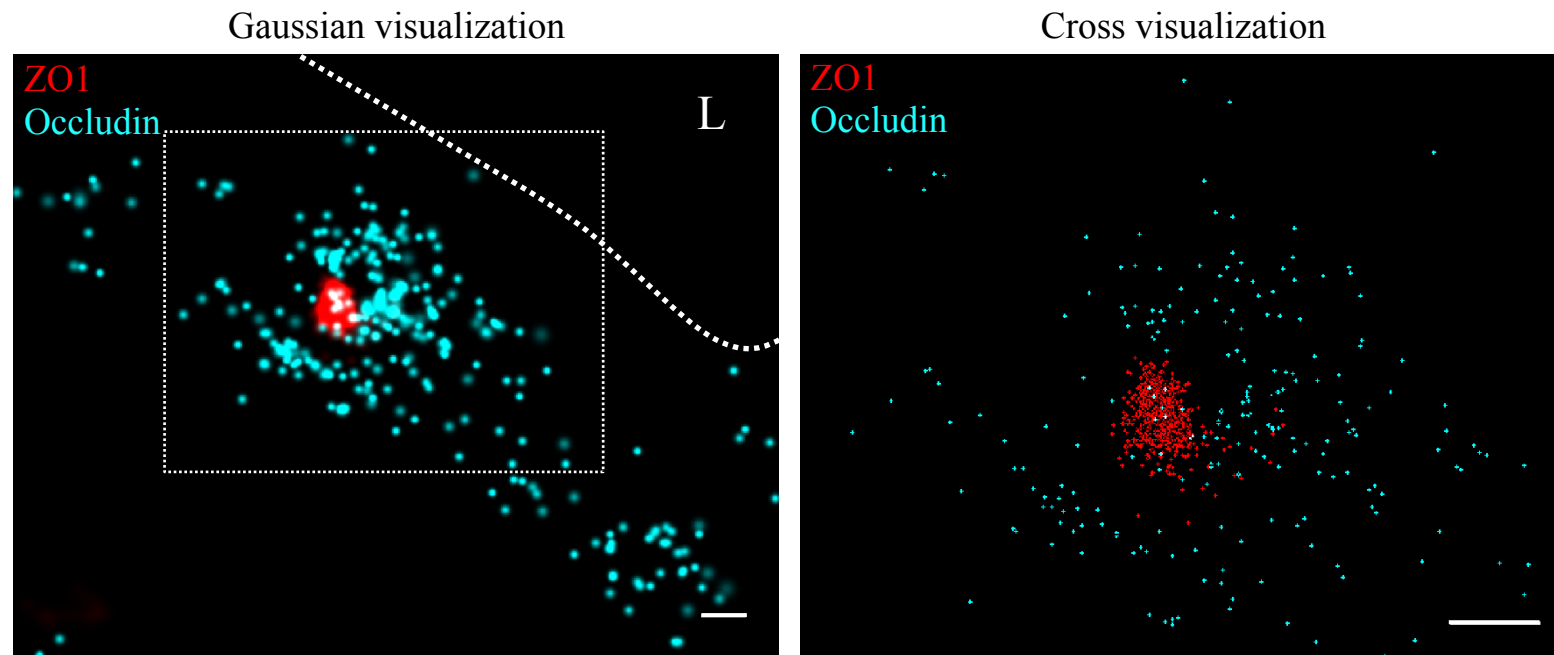

Supplement: supp [file elife-63253-supp-v1.zip]

**Figure 1-figure supplement 1**

**clustering analysis – threshold distances**

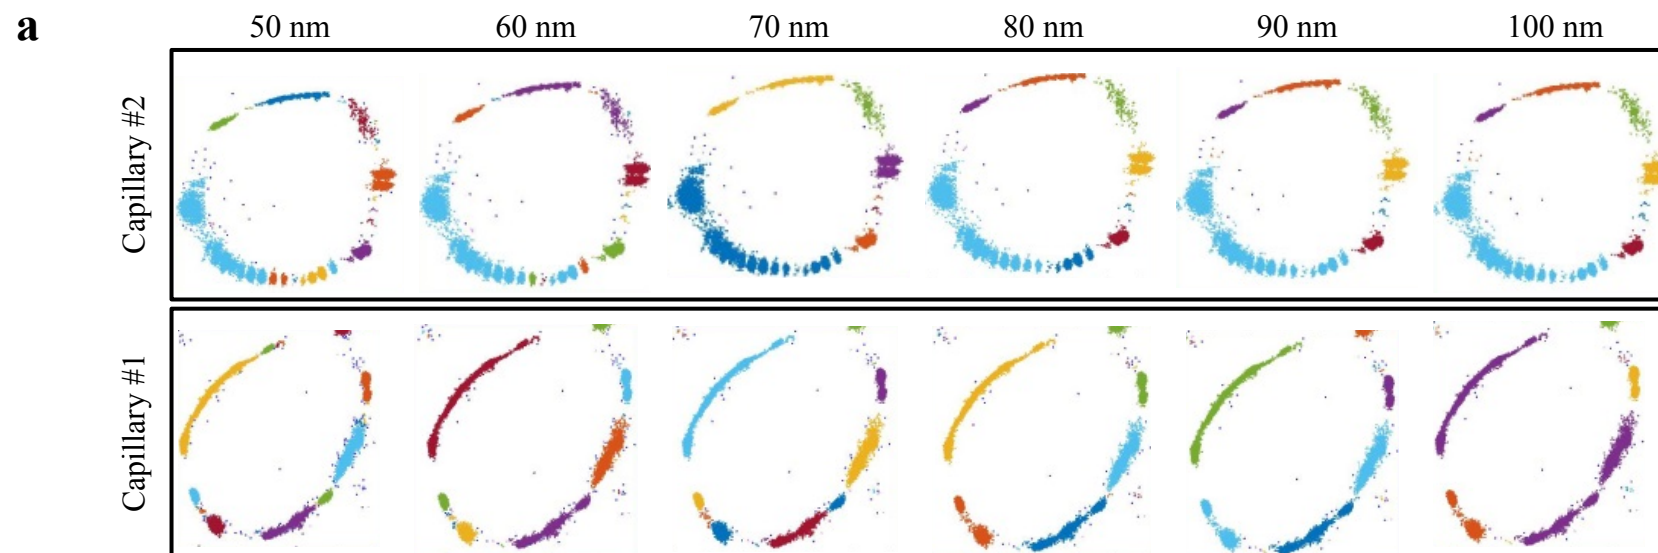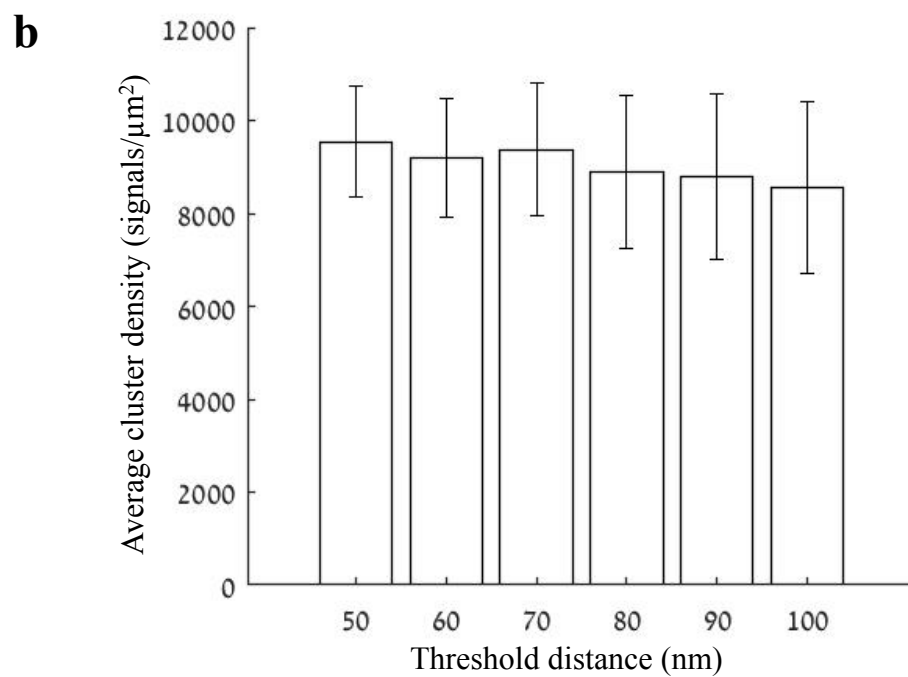

Supplement: supp [file elife-63253-supp-v1.zip]

**Figure 5-figure supplement 1**

**Claudin-5 clustering properties**

**a**

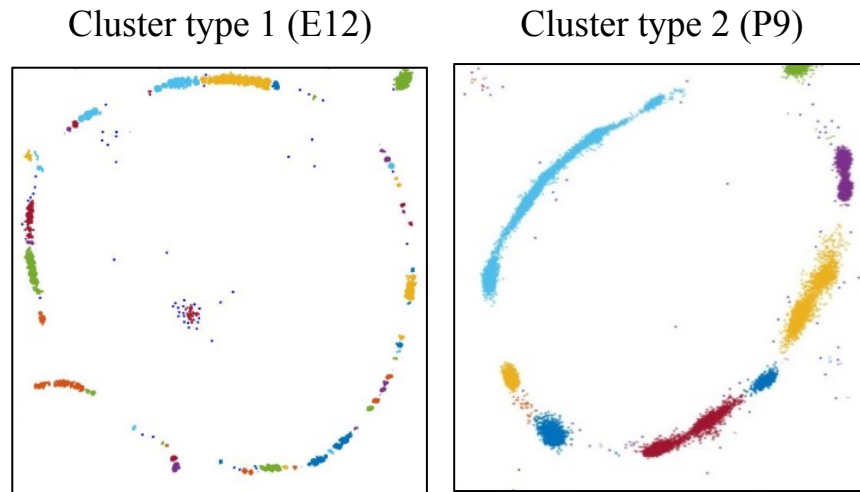

**b**

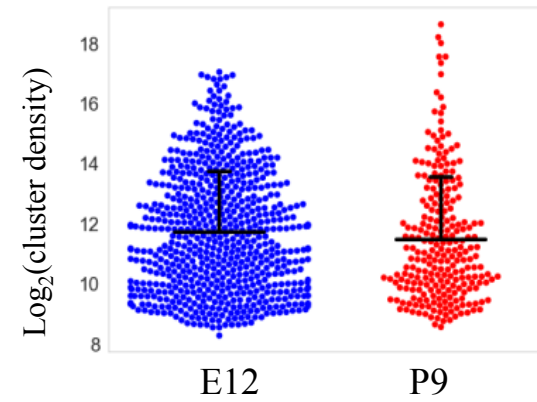

Supplement: supp [file elife-63253-supp-v1.zip]

**Figure 2-figure supplement 2**

**iBMECs TEER is elevated along days in culture**

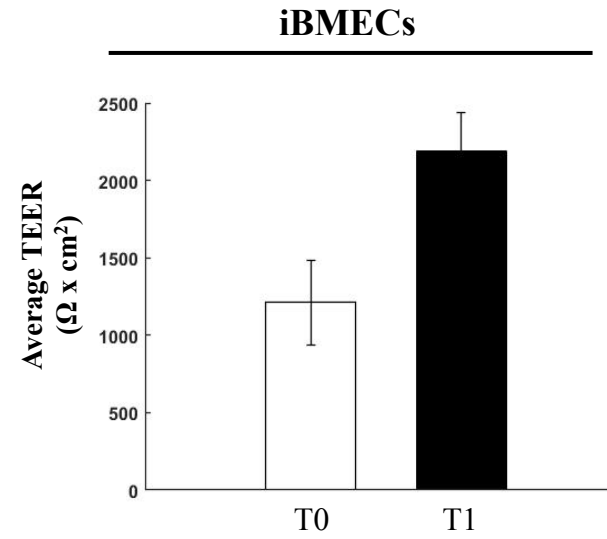

Supplement: supp [file elife-63253-supp-v1.zip › elife_poa_e63253_Figure_2_figure_supplement_2.pdf]
